1 **Differential Effects of “Resurrecting” Csp Pseudoproteases during *Clostridioides difficile***

2 **Spore Germination**

3

4 M. Lauren Donnelly,<sup>1,2</sup> Emily R. Forster,<sup>1,2</sup> Amy E. Rohlfing,<sup>1</sup> and Aimee Shen<sup>1#</sup>

5

6 <sup>1</sup>Department of Molecular Biology and Microbiology, Tufts University School of Medicine,

7 Boston, Massachusetts, USA, <sup>2</sup>Sackler School of Graduate Biomedical Sciences, Tufts

8 University School of Medicine, Boston, Massachusetts, USA.

9

10 #Address correspondence to

11 Aimee Shen, [aimee.shen@tufts.edu](mailto:aimee.shen@tufts.edu)

12 Phone number: (617)636-3792

13

14 **Abstract**

15

16 *Clostridioides difficile* is a spore-forming bacterial pathogen that is the leading cause of hospital-  
17 acquired gastroenteritis. *C. difficile* infections begin when its spore form germinates in the  
18 vertebrate gut upon sensing bile acids. These germinants induce a proteolytic signaling cascade  
19 controlled by three members of the subtilisin-like serine protease family, CspA, CspB, and  
20 CspC. Notably, even though CspC and CspA are both pseudoproteases, they are nevertheless  
21 required to sense germinants and activate the protease, CspB. Thus, CspC and CspA are part of a  
22 growing list of pseudoenzymes that play important roles in regulating cellular processes.  
23 However, despite their importance, the structural properties of pseudoenzymes that allow them to  
24 function as regulators remain poorly understood. Our recently determined crystal structure of  
25 CspC revealed that its degenerate site residues align closely with the catalytic triad of CspB, so  
26 in this study we tested whether the ancestral protease activity of the CspC and CspA  
27 pseudoproteases could be “resurrected.” Restoring the catalytic triad to these pseudoproteases  
28 failed to resurrect their protease activity, although the mutations differentially affected the  
29 stability and function of these pseudoproteases. Degenerate site mutations destabilized CspC and  
30 impaired spore germination without impacting CspA stability or function. Thus, our results  
31 surprisingly reveal that the presence of a catalytic triad does not necessarily predict protease  
32 activity. Since close homologs of *C. difficile* CspA occasionally carry an intact catalytic triad,  
33 our results imply that bioinformatics predictions of enzyme activity may overlook  
34 pseudoenzymes in some cases.

35

36 **Abbreviations List:** n/a

## 37 **Introduction**

38           Catalytically-deficient structural homologs of functional enzymes known as  
39           pseudoenzymes were first discovered more than 50 years ago, but they were frequently  
40           dismissed as vestigial remnants of evolution because they lacked catalytic activity [1]Ribeiro,  
41           2019 #94}. However, the prevalence of pseudoenzyme genes, estimated at 10-15% of a typical  
42           genome [2] across all domains of life [1, 3], suggested that they have important biological  
43           functions. Indeed, recent work has established that pseudoenzymes perform diverse and crucial  
44           cellular functions [1, 4, 5], controlling metabolic and signaling pathways in processes ranging  
45           from cell cycle progression to protein trafficking. In this sense pseudoenzymes have been  
46           ‘brought back to life’[1, 3-5], which is why they have been referenced as ‘zombie’ proteins in the  
47           literature [1, 4].

48           While pseudoenzymes have been identified in over 20 different protein families,  
49           including pseudokinases, pseudophosphatases, and pseudoproteases [1, 3], the mechanisms by  
50           which they modulate cellular processes are poorly understood, since relatively few predicted  
51           pseudoenzymes have been thoroughly studied in biological systems. Studies thus far indicate that  
52           pseudoenzymes can allosterically regulate the activity of cognate enzymes, nucleate protein  
53           complexes by acting as cellular scaffolds, control protein localization, and act as competitors for  
54           substrate binding or holoenzyme assembly [3, 5].

55           Even less well understood are the structural properties of pseudoenzymes that allow them  
56           to carry out these functions. Bioinformatic analyses imply that most pseudoenzymes have  
57           evolved from ancestral cognate enzymes due to loss of one or more residues required for  
58           catalysis or co-factor binding [6, 7]. However, it is difficult to assess bioinformatically whether  
59           pseudoenzymes have acquired additional mutations beyond these catalytic site mutations that

60 prevent their ancestral enzymatic function. Indeed, this question has only been experimentally  
61 addressed in a handful of studies [1]. Converting the degenerate glycine residue of the STYX  
62 pseudophosphatase to a catalytic cysteine readily restored its hydrolytic activity [8, 9]. In  
63 contrast, mutations to restore the degenerate sites of pseudokinases have had differential effects  
64 depending on the pseudokinase. When residues required for binding ATP were restored in the  
65 RYK pseudokinase, it re-gained kinase activity [10]. Conversely, the equivalent mutation in the  
66 HER3 pseudokinase failed to restore its kinase activity [11, 12]. Similarly, when a critical  
67 catalytic cysteine was restored to the DivL histidine pseudokinase of the bacterium *Caulobacter*  
68 *crescentus*, it did not regain kinase activity [13].

69         While the question of whether pseudoenzymes can be converted back into active  
70 enzymes has been experimentally tested for pseudophosphatases and pseudokinases, this  
71 question has not yet been examined for pseudoproteases. In this study, we attempted to resurrect  
72 the protease activity of two pseudoproteases, CspA and CspC, which play critical roles in the life  
73 cycle of *Clostridioides difficile*, a spore-forming bacterial pathogen that is the leading cause of  
74 nosocomial gastroenteritis worldwide [14, 15]. In the U.S. alone, *C. difficile* caused ~225,000  
75 infections and ~13,000 deaths in 2017, leading to medical costs in excess of \$1 billion [16].  
76 Indeed, *C. difficile* has been classified as an urgent threat by the Centers for Disease Control  
77 because of its intrinsic resistance to antibiotics and the risk this poses to patients undergoing  
78 antimicrobial treatment [17].

79         *C. difficile* infections are transmitted by its incredibly resistant and infectious spore form.  
80 Because *C. difficile* is an obligate anaerobe, its vegetative cells cannot survive in the presence of  
81 oxygen [18, 19]. Thus, *C. difficile* infections begin when its metabolically dormant spores  
82 germinate in the gut of vertebrate hosts in response to bile acids [20]. Notably, unlike almost all

83 other spore-formers studied to date, *C. difficile* senses bile acid germinants instead of nutrient  
84 germinants [21, 22]. The bile acid germinant signal is transduced by clostridial serine proteases  
85 known as the Csps [23-26], which are members of the subtilisin-like serine protease family  
86 members [27, 28] conserved in many clostridial species [29]. In these organisms, the three Csp  
87 proteins, CspA, CspB and CspC, participate in a signaling cascade that leads to the proteolytic  
88 activation of the SleC cortex hydrolase. Activated SleC then removes the protective cortex layer,  
89 which is essential for spores to exit dormancy [23, 30].

90         While CspA, CspB, and CspC are all active in *Clostridium perfringens* [28], *C. difficile*  
91 CspC and CspA carry substitutions in their catalytic triad that render them pseudoproteases [23,  
92 24, 31]. CspC is thought to directly sense bile acid germinants [24] and integrate signals from  
93 cation and amino acid cogerminants that potentiate germination in the presence of bile acid  
94 germinants [32]. CspA has been proposed to function as the cation and amino acid co-germinant  
95 receptor [26] while also being necessary for CspC to be packaged into mature spores [25]. Thus,  
96 both CspC and CspA are required to activate the CspB protease, which subsequently cleaves the  
97 SleC cortex hydrolase [23]. CspB is a canonical subtilisin-like serine protease family member: it  
98 carries an intact catalytic triad consisting of aspartate, histidine, and serine residues and a long  
99 N-terminal prodomain that serves as an intramolecular chaperone to induce proper folding of the  
100 protease domain [27]. Like other active subtilases [27], once the protease domain of CspB adopts  
101 an active conformation, it undergoes autoprocessing to separate the prodomain from the protease  
102 domain. In contrast, CspA and CspC do not undergo autoprocessing in *C. difficile* [23, 25],  
103 presumably because they both carry mutations in their catalytic triad.

104         Interestingly, *cspA* and *cspB* are encoded in a single ORF, *cspBA*, such that the resulting  
105 fusion protein physically links the active CspB protease to the inactive CspA pseudoprotease.

106 CspBA's protease-pseudoprotease arrangement is largely conserved in the  
107 Peptostreptococcaceae family to which *C. difficile* belongs [25], with the CspB domain carrying  
108 an intact catalytic triad in all sequences examined and the CspA domain typically carrying at  
109 least one mutation in its catalytic triad ([25], **Figure 1A**). While the catalytic site mutations  
110 present in the CspA pseudoprotease vary in the Peptostreptococcaceae family, the degenerate site  
111 residues of CspC are strictly conserved within this family ([25], **Figure 1B**). In contrast,  
112 members of the Lachnospiraceae and Clostridiaceae families encode all three Csp proteins as  
113 individual proteases with intact catalytic triads. Accordingly, all three Csp proteins in *C.*  
114 *perfringens* undergo autoprocessing in mature spores [28], indicating that they are active  
115 proteases that can presumably process pro-SleC to active SleC cortex hydrolase in spores [33].  
116 Based on these observations, it seems likely that the CspA and CspC pseudoproteases of the  
117 Peptostreptococcaceae family are the “odd ones out” among clostridial serine proteases (Csps) in  
118 their lack of catalytic activity.

119         Interestingly, we recently showed that CspC's degenerate site residues closely align with  
120 the catalytic triad of the active CspB protease in the X-ray crystal structure of CspC ([32],  
121 **Figure 1B**), leading us to query whether restoring an intact catalytic triad would be sufficient to  
122 convert CspC into an active protease capable of undergoing autoprocessing like other subtilisin-  
123 like serine proteases [27]. Since structural modeling of CspA also predicted close alignment of  
124 its degenerate site residues with CspB's catalytic triad residues (**Figure 1B**), we tested the effect  
125 of restoring the catalytic triads of *C. difficile* CspC and CspA to gain insight into the evolution of  
126 these “zombie” proteins from active proteases and the structural requirements for their function  
127 in *C. difficile*.

128

## 129 **Experimental**

130

### 131 **Bacterial strains and growth conditions.**

132 *C. difficile* strain construction was performed using 630 $\Delta$ erm $\Delta$ cspC $\Delta$ pyrE [31] and  
133 630 $\Delta$ erm $\Delta$ pyrE- $\Delta$ cspBA as the parental strains via pyrE-based allele-coupled exchange (ACE  
134 [34]). This system allows for single-copy complementation of the  $\Delta$ cspC and  $\Delta$ cspBA parental  
135 mutants, respectively, from an ectopic locus. *C. difficile* strains are listed in **Table S1**. They were  
136 grown on brain heart infusion media (BHIS) supplemented with taurocholate (TA, 0.1% w/v; 1.9  
137 mM), thiamphenicol (10-15  $\mu$ g/mL), kanamycin (50  $\mu$ g/mL), cefoxitin (8  $\mu$ g/mL), and L-  
138 cysteine (0.1% w/v; 8.25 mM) as needed. Cultures were grown under anaerobic conditions at  
139 37°C using a gas mixture containing 85% N<sub>2</sub>, 5% CO<sub>2</sub>, and 10% H<sub>2</sub>.

140 *Escherichia coli* strains for BL21(DE3)-based protein production and for HB101/pRK24-  
141 based conjugations are listed in **Table S1**. *E. coli* strains were grown shaking at 225 rpm in  
142 Luria-Bertani broth (LB) at 37 °C. The media was supplemented with ampicillin (50  $\mu$ g/mL),  
143 chloramphenicol (20  $\mu$ g/mL) or kanamycin (30  $\mu$ g/mL) as indicated.

144

### 145 ***E. coli* strain construction**

146 *E. coli* strains are listed in **Table S1** in the supplementary material. As previously  
147 described [32], the cspC complementation constructs were created using flanking primers, #2189  
148 and 2242 (**Table S3**), in combination with internal primers encoding a given point mutation,  
149  $\Delta$ cspBA genomic DNA was used as the template. This resulted in cspC complementation  
150 constructs carrying 282 bp of the cspBA upstream region in addition to the  $\Delta$ cspBA sequence and  
151 the intergenic region between cspBA and cspC. This extended construct was required to produce

152 wild-type levels of CspC when expressing the constructs in the *pyrE* locus [31, 34]. For example,  
153 the T170H mutation was constructed using primer pair #2189 and 2355 to amplify a 5' *cspC*  
154 complementation construct fragment encoding the T170H mutation at the 3' end, while primer  
155 pair #2354 and 2242 were used to amplify a 3' *cspC* complementation construct encoding the  
156 T170H mutation at the 5' end. The individual 5' and 3' products were cloned into pMTL-YN1C  
157 digested with NotI/XhoI by Gibson assembly. In some cases, the two PCR products were used in  
158 a PCR SOE [35] prior to using Gibson assembly to clone the *cspC* construct into pMTL-YN1C  
159 digested with NotI and XhoI. The resulting plasmids were transformed into *E. coli* DH5 $\alpha$ ,  
160 confirmed by sequencing, and transformed into HB101/pRK24.

161 Similarly, for *cspBA* complementation constructs, each construct was designed with 126  
162 bp of the  $\Delta$ *cspC* sequence downstream of *cspBA* in order to fully complement the  $\Delta$ *cspBA*  
163 mutant as previously described [31]. All primers used for strain construction are listed in **Table**  
164 **S3**. For example, the Q757H point mutation was introduced into the complementation constructs  
165 by using primer pair #2189 and #3041 to amplify the 5' end, and #3040 and #2242 to amplify the  
166 3' end. The A1064S mutant was designed in the same way, but with primer pair #3042 and  
167 #3043 to introduce the point mutation. The 5' and 3' products containing the various mutations  
168 were cloned into pMTL-YN1C digested with NotI/XhoI and combined through Gibson  
169 assembly. Depending on the construct, some PCR products were combined by PCR SOE prior to  
170 using Gibson assembly. The resulting plasmids were transformed into *E. coli* DH5 $\alpha$ , confirmed  
171 by sequencing, and transformed into HB101/pRK24.

172 To clone the construct encoding the *cspBA* prodomain trans-complementation construct,  
173 primer pair #2189 and 951 was used to amplify the 5' fragment, and primer pair #950 and 2242  
174 were used to amplify the 3' fragment. In both cases,  $\Delta$ *cspC* genomic DNA was used as a



175 template as described previously [31]. The resulting two fragments were joined together using  
176 PCR SOE with primer pair #2189 and 2242, and the PCR SOE product was cloned into pMTL-  
177 YNIC digested with NotI and XhoI using Gibson assembly. A similar strategy was used to  
178 generate the *cspC* prodomain trans-complementation construct. Primers #2189 and 2553 were  
179 used to amplify the 5' fragment, and primer pair #2552 and 2242 were used to amplify the 3'  
180 fragment using  $\Delta cspBA$  genomic DNA as a template. The fragments were joined together using  
181 SOE PCR with the primer pair #2189 and 2242, and the resulting SOE PCR product was cloned  
182 into pMTL-YNIC digested with NotI and XhoI using Gibson assembly [32].

183 To generate the recombinant protein expression constructs for producing CspC-His<sub>6</sub>  
184 variants, primer pair #1128 and 1129 was used to amplify a codon-optimized version of *cspC*  
185 using pJS148 as the template (a kind gift from Joseph Sorg) as previously described [32]. The  
186 resulting PCR product was digested with NdeI and XhoI and ligated into pET22b cut with the  
187 same enzymes. The G457R variant was cloned using a similar procedure except that primer pair  
188 #1128 and 1361 and primer pair #1360 and 1129 were used to PCR the 5' and 3' fragments  
189 encoding the G457R mutation. The resulting PCR products were joined together using PCR SOE  
190 and flanking primer pair #1128 and 1129.

191 The remaining constructs encoding *cspC* codon-optimized variants for expression using  
192 pET22b were cloned using Gibson assembly. Flanking primer pair #2311 and 2312 were used to  
193 generate PCR products when used in combination with the internal primers encoding the point  
194 mutations. The resulting PCR products were cloned into pET22b digested with NdeI and XhoI  
195 using Gibson assembly. PCR SOE was sometimes used to join the two 5' and 3' fragments prior  
196 to Gibson assembly into pET22b. Similarly, the CspBA-His<sub>6</sub> recombinant protein expression  
197 constructs, were constructed using primers #3034 and 3035 to create a codon-optimized version

198 of *cspBA*. The Q757H and A1064S point mutations were introduced using primer pairs, #3036  
199 and 3037, and #3038 and 3039, respectively. The resulting PCR products were digested with  
200 NcoI/XhoI, ligated into pET28a, and transformed into BL21.

201 To generate the recombinant protein expression constructs for producing CspBA-His<sub>6</sub>  
202 variants, primer pair #1505 and 1529 was used to amplify a codon-optimized version of *cspB*  
203 using a plasmid template (a kind gift from Joseph Sorg). The resulting PCR product was digested  
204 with NcoI and HindIII and ligated into pET28a digested with the same enzymes. Codon-  
205 optimized *cspA* was then amplified using primer pair #1507 and 1508 using another plasmid  
206 template from Joseph Sorg. The resulting PCR product was used as the template for a second  
207 PCR using primer pair #1530 and 1508. This PCR product was digested with HindIII and XhoI  
208 and then ligated into pET28a-*cspB* CO digested with the same enzymes.

209

## 210 **Protein purification for Recombinant *E. coli* Analyses**

211 *E. coli* BL21(DE3) strains listed in **Table S2** were used to produce and purify codon-  
212 optimized *cspC* variants and *cspBA* variants as previously described [23]. Briefly, cultures were  
213 grown to mid-log phase in 2YT (5 g NaCl, 10 g yeast extract, and 15 g tryptone per liter). When  
214 cultures reached an OD<sub>600</sub> ~0.8, 250 μM isopropyl-β-D-1-thiogalactopyranoside (IPTG) was  
215 added to induce expression of *cspC*. Cultures were then grown overnight at 18°C. The cells were  
216 pelleted, resuspended in lysis buffer (500 mM NaCl, 50 mM Tris [pH 7.5], 15 mM imidazole,  
217 10% [vol/vol] glycerol), flash frozen in liquid nitrogen, thawed and finally sonicated. The  
218 insoluble material was pelleted, and the soluble fraction was incubated with Ni-NTA agarose  
219 beads (5 Prime) for 3 hrs, and eluted using high-imidazole buffer (500 mM NaCl, 50 mM Tris  
220 [pH 7.5], 200 mM imidazole, 10% [vol/vol] glycerol) after nutating the sample for 5-10 min.

221

## 222 ***C. difficile* strain construction**

223           Complementation strains were constructed using CDDM to select for recombination of  
224 the complementation construct into the *pyrE* locus by restoring uracil prototrophy [34], as  
225 previously described [36]. At least two independent clones from each complementation strain  
226 were phenotypically characterized.

227

## 228 **Sporulation**

229           *C. difficile* strains were grown overnight on BHIS plates containing taurocholate (TA,  
230 0.1% w/v, 1.9 mM). Liquid BHIS cultures were inoculated from the resulting colonies, which  
231 were grown to early stationary phase before being back-diluted 1:50 into BHIS. When the  
232 cultures reached an OD<sub>600</sub> between 0.35 and 0.75, 120 µL of this culture were plated onto 70:30  
233 agar plates and grown for 18-24 hours as previously described [37]. Sporulating cells were  
234 harvested into phosphate-buffered saline (PBS), and cells were visualized by phase-contrast  
235 microscopy [38].

236

## 237 **Spore purification**

238           Sporulation was induced on 70:30 agar plates for 2-3 days as described above, and spores  
239 were purified as previously described [30]. Briefly, the samples were harvested into sterile water  
240 at 4°C. The samples were washed 6-7 times in 1 mL of ice-cold water per every 2 plates and  
241 incubated overnight in water at 4°C. The samples were then pelleted and incubated with DNase I  
242 (New England Biolabs) at 37 °C for 60 minutes. Finally, samples were purified on a 20%:50%  
243 HistoDenz (Sigma Aldrich) gradient and washed 2-3 more times in water. Spore purity was

244 assessed using phase-contrast microscopy (>95% pure). The optical density of the spore stock  
245 was measured at OD<sub>600</sub>, and spores were stored in water at 4 °C.

246

### 247 **Germination assay**

248 As previously described [30], germination for each strain used the equivalent of 0.35  
249 OD<sub>600</sub> units, which corresponds to  $\sim 1 \times 10^7$  spores. The proper number of spores was  
250 resuspended in 100  $\mu$ l of water, 10  $\mu$ L of this mixture was serially diluted in PBS, and the  
251 resulting dilutions were plated on BHIS-TA. Colonies arising from germinated spores were  
252 enumerated at 18-24 hrs. Germination efficiencies were calculated using mean CFUs produced  
253 by spores for a given strain relative to the mean CFUs produced by wild type. Analyses were  
254 based on at least three technical replicates performed on two independent spore preparations (i.e.  
255 two biological replicates). Statistical significance was determined by performing a one-way  
256 analysis of variance (ANOVA) on natural log-transformed data using Tukey's test.

257

### 258 **OD<sub>600</sub> kinetics assay**

259 As previously described [39], approximately  $1.5 \times 10^7$  spores (0.48 OD<sub>600</sub> unit) were  
260 resuspended in BHIS to a total volume of 1.1 mL. The sample was divided in two: 540  $\mu$ l was  
261 added to a cuvette containing 60  $\mu$ l of 10% taurocholate, while the other sample was added to a  
262 cuvette containing 60  $\mu$ l of water, as a control. The samples were mixed, and the OD<sub>600</sub> was  
263 measured every 3 min for 90 min. Statistical significance was determined by performing a two-  
264 way analysis of variance (ANOVA) using Tukey's test.

265

### 266 **Western blot analysis**

267 Samples for western blot analysis were prepared as previously described [40]. Briefly,  
268 sporulating cell pellets were resuspended in 100  $\mu$ L of PBS, and 50  $\mu$ L samples were removed  
269 and freeze-thawed for three cycles. The samples were resuspended in 100  $\mu$ L EBB buffer (8 M  
270 urea, 2 M thiourea, 4% (w/v) SDS, 2% (v/v)  $\beta$ -mercaptoethanol), boiled for 20 min, pelleted,  
271 resuspended in the same volume. Subsequently, 7  $\mu$ L of sample buffer was added to stain  
272 samples with bromophenol blue. *C. difficile* spores ( $\sim 1 \times 10^7$ ) were resuspended in 50  $\mu$ L EBB  
273 buffer and processed similarly. The samples were resolved by 7.5% (for sporulating cell analyses  
274 of CspBA and CspC) or 12% SDS-PAGE gels. After, the gels were transferred to Millipore  
275 Immobilon-FL PVDF membranes and were blocked in Odyssey Blocking Buffer [36] for 30  
276 mins with 0.1% (v/v) Tween 20. Blots were incubated with rabbit polyclonal anti-CspB [23],  
277 anti-CspA (a generous gift from Joe Sorg, Texas A&M University, [26]) or anti-CotA antibodies  
278 and/or mouse polyclonal anti-SleC [23] , anti-CspC [25], or anti-SpoIVA antibodies [41].  
279 Additionally, western blotting for recombinant protein samples were blotted with commercial  
280 antibody, mouse monoclonal anti-penta-His (ThermoScientific). The anti-CspB, anti-CspC, anti-  
281 SpoIVA antibodies were used at 1:2500 dilutions, the anti-SleC antibody was used at a 1:5000  
282 dilution, and the anti-pentaHis, anti-CotA, and anti-CspA antibodies were used at a 1:1000  
283 dilution. IRDye 680CW and 800CW infrared dye-conjugated secondary antibodies were used at  
284 1:20,000 dilutions. The Odyssey LiCor CLx was used to detect secondary antibody infrared  
285 fluorescence emissions. All blots shown are representative of analyses performed on two  
286 independent spore preparations.

287

## 288 **Protein Modeling**

289 Multiple protein model predictions were used to analyze the CspA structure. Specifically,  
290 we analyzed several predictions by I-TASSER (Iterative Threading ASSEmby Refinement)  
291 [42]. All prediction models were downloaded as PDB files and were viewed using PyMol. The  
292 CspA sequence used was taken from the *cspBA* gene, starting at codon 560 which has been  
293 predicted to encode the YabG cleavage site [26]. CspA predictions were aligned with the RCSB  
294 PDB files of the CspB (PDB 4I0W) protease and CspC pseudoprotease (PDB 6MW4).

295

### 296 **Protein Sequence Analysis**

297 Protein sequences were obtained from NCBI protein by searching for homologous  
298 sequences to CspBA and CspC, respectively, in *Clostridioides difficile* strain 630 filtering only  
299 for species within the Peptostreptococcaceae family. The algorithm “PSI-BLAST” was used to  
300 identify distant relatives of the proteins of interest. Homologs that had >95% query cover were  
301 selected for analysis, and for CspC homologs only, sequences which additionally had >55%  
302 identity were selected to avoid redundancy with CspA or CspB individual homologs. For all  
303 analyses only the first 3 organisms from each species were selected, in order to avoid skewing of  
304 the data based on the most sequenced organisms. The selected sequences were analyzed using  
305 MacVector and aligned with the ClustalW algorithm. The regions surrounding the catalytic  
306 residues were selected based on previous analyses [25] using the MEROPS protease database  
307 [43] active site definitions for peptidase family S8A. Information regarding accession numbers  
308 for selected homologs is provided in **Table S3** and **Table S4**.

309

### 310 **Results**

311

312 **Restoring CspC's catalytic triad disrupts protein folding and abrogates its function.**

313 To determine if protease activity could be resurrected in the CspC pseudoprotease, we  
314 restored the degenerate residues of CspC's catalytic triad (**Figure 1A**) individually and in  
315 combination. To this end, we generated strains producing CspC variants carrying the following  
316 amino acid substitutions: threonine 170 to histidine (CspC<sub>T170H</sub>), glycine 485 to serine  
317 (CspC<sub>G485S</sub>), and T170H-G485S (referred to as CspC<sub>2<sub>xcat</sub></sub>). The constructs encoding these  
318 substitutions were integrated into the *pyrE* locus of a previously characterized in-frame *cspC*  
319 deletion mutant [31] using allele-coupled exchange [34]. These constructs, along with all other  
320 *cspC* constructs analyzed in this manuscript, were expressed from the native *cspBA-cspC*  
321 promoter as described previously [31].

322 To assess whether the T170H-G485S substitutions in CspC activated the autoprocessing  
323 activity characteristic of subtilisin-like serine proteases [27, 44], we analyzed CspC processing in  
324 sporulating cells using western blotting. Rather than restoring autoprocessing activity, mutations  
325 in the degenerate sites decreased CspC levels in sporulating cell lysates: no CspC was detectable  
326 in lysates of the double mutant (*2<sub>xcat</sub>*) strain (**Figure 2B**), and CspC levels were markedly  
327 diminished in the *G485S* mutant and slightly reduced in the *T170H* mutant. Taken together,  
328 mutations in CspC's degenerate residues reduce CspC production and/or stability in sporulating  
329 cells. In contrast, CspBA levels were unaffected in the mutant strains (**Figure 2B**), consistent  
330 with the observation that CspC does not affect CspBA levels [31].

331 To determine whether the reduced CspC protein levels in the degenerate site mutants  
332 were due to general protein folding defects, we cloned the mutant alleles into recombinant  
333 protein expression vectors and assessed His-tagged CspC variant levels and autoprocessing in  
334 *E. coli*. We also assessed their purification efficiency from the soluble fraction of *E. coli* lysates.

335 As a control, we cloned the *cspC*<sub>G171R</sub> allele, which abrogates germination in *C. difficile*, [24]  
336 likely by disrupting CspC folding due to steric hindrance (**Figure 3A**, [32]). Recombinant  
337 CspC<sub>2xcat</sub> did not undergo autoprocessing when produced in *E. coli* (**Figure 3B**, Induced  
338 fraction), indicating that restoring the catalytic triad does not reconstitute CspC protease activity.  
339 However, when recombinant CspC<sub>2xcat</sub> was purified from the soluble fraction, markedly less  
340 CspC<sub>2xcat</sub> was obtained relative to wild-type CspC-His<sub>6</sub> (Elution fraction, **Figure 3B**) even  
341 though CspC<sub>2xcat</sub> was observed at wild-type levels following IPTG induction (Induced fraction,  
342 **Figure 3B**). The purification yields for the single degenerate site variants were similarly reduced  
343 relative to wild-type CspC despite their wild-type induction levels in *E. coli*, and the predicted  
344 protein folding mutant, *G171R*, yielded the lowest amount of soluble purified CspC.  
345 Unfortunately, it was not possible to assess whether the mutant alleles reduced the solubility of  
346 CspC, because wild-type CspC was largely detected in the insoluble fraction in *E. coli* (data not  
347 shown).

348

### 349 **Degenerate site mutations decrease germination rates and germinant sensitivity**

350 To evaluate how the CspC degenerate site mutations impacted CspC function during  
351 spore germination, we measured the ability of these mutant alleles to complement  $\Delta cspC$ 's  
352 germination defect. Purified spores from wild-type,  $\Delta cspC$ ,  $\Delta cspC/cspC$ , and the degenerate site  
353 mutant complementation strains were plated on rich media containing 0.1% taurocholate  
354 germinant, and the number of colony forming units (CFUs) that arose from germinating spores  
355 relative to wild type was determined. The *cspC*<sub>T170H</sub> allele did not affect germination relative to  
356 wild type even though CspC<sub>T170H</sub> protein levels were visibly decreased in western blot analyses  
357 of purified spores (**Figure 2B**). The *cspC*<sub>G485S</sub> allele resulted in only a ~10-fold defect in



358 germination efficiency despite producing almost undetectable levels of CspC<sub>G485S</sub> protein. In  
359 contrast, the *2xcat* double mutant exhibited a germination defect (~1,000-fold) equivalent to that  
360 of the parental  $\Delta cspC$  strain, consistent with the absence of detectable CspC<sub>2xcat</sub> in sporulating  
361 cells and purified spores (**Figure 2B**). Low levels of “spontaneous” germination were observed  
362 in the  $\Delta cspC$  spores, similar to previous analyses of other germinant receptor mutants [31, 36,  
363 45, 46]. These results indicate that relatively little CspC is needed to allow *C. difficile* spores to  
364 germinate.

365         Although the *G485S* mutant exhibited only an ~10-fold germination defect when spores  
366 were plated on rich media containing 0.1% germinant, *G485S* colonies arose more slowly than  
367 colonies derived from wild-type spores. To test whether the *G485S* and *T170H* degenerate site  
368 mutations affected the rate of germination, we used an optical density-based germination assay.  
369 This assay measures the decrease in optical density of a population of germinating spores over  
370 time due to cortex hydrolysis and core hydration [39]. While the optical density of wild-type  
371 spores decreased by ~40%, the optical density of the *G485S* mutant did not appreciably change  
372 over the assay period, similar to the  $\Delta cspC$  strain (**Figure 2C**,  $p < 0.0001$ ). Surprisingly, the  
373 *T170H* mutant germinated more slowly relative to wild type ( $p < 0.0001$ ) even though *cspC*<sub>*T170H*</sub>  
374 did not exhibit a germination defect in the plate-based CFU assay. Taken together, these results  
375 indicate that single mutations in CspC’s degenerate active site impair folding and/or decrease  
376 CspC stability in sporulating cells. These decreased CspC levels correlate with slower spore  
377 germination rates. Furthermore, rather than conferring autoprocessing activity to CspC, restoring  
378 its full catalytic triad appears to cause protein misfolding and reduces CspC levels in spores.

379         We next wondered whether the reduced CspC levels in the *T170H* and *G485S* mutant  
380 spores would decrease their germinant sensitivity. We had previously determined that spores

381 lacking GerG have decreased CspB, CspA, and CspC levels, which correlated with diminished  
382 responsiveness to germinant [36]. Importantly, unlike *gerG* mutant spores, the degenerate site  
383 mutants carry wild-type levels of CspB and CspA in purified spores (**Figure 2B**). Thus,  
384 germination defects in CspC degenerate site mutants can be attributed to impaired CspC function  
385 and/or decreased protein levels rather than changes in CspB or CspA levels. To measure  
386 germinant sensitivity, we plated *cspC* mutant spores on rich media containing varying  
387 concentrations of taurocholate germinant. On plates containing 0.001% taurocholate, *T170H* and  
388 *G485S* mutant spores germinated to a similar extent as  $\Delta cspC$  spores ( $p \leq 0.005$ , **Figure 2D**).  
389 However, on plates with 0.01% taurocholate, *T170H* mutant spores germinated to near wild-type  
390 levels, whereas *G485S* spores exhibited an ~100-fold decrease relative to wild type ( $p < 0.0001$ ).  
391 At the highest concentration of germinant tested (0.1% taurocholate), *T170H* mutant spores were  
392 indistinguishable from wild-type spores, and the *G485S* mutant spores exhibited an ~10-fold  
393 decrease in CFUs (**Figure 2D**,  $p < 0.0001$ ) consistent with our prior findings (**Figure 2B**). Thus,  
394 decreased CspC protein levels and/or function in the degenerate site mutants impairs germinant  
395 sensing even when CspB and CspA are present at wild-type levels, consistent with CspC's  
396 proposed role as the germinant receptor [24].

397

### 398 **The CspC prodomain cannot function in *trans***

399       Since our attempts to “resurrect” CspC’s active site appeared to destabilize the protein,  
400 we wondered whether we could bypass the autoprocessing event by producing the CspC  
401 prodomain separate from the CspC subtilase domain. As mentioned earlier, subtilisin-like serine  
402 proteases use their long N-terminal prodomain as an intramolecular chaperone to promote  
403 folding of the subtilase domain into an active conformation [44]. The prodomains of other

404 subtilisin-like serine proteases (including CspB in *C. difficile*) can perform this chaperone  
405 function *in trans* [23, 27, 44]. We thus tested whether *C. difficile* CspC's prodomain could  
406 function as a chaperone *in trans*, even though CspC normally does not undergo autoprocessing.  
407 To this end, we generated a complementation construct (L64<sub>TAG</sub>) that produced the prodomain  
408 (residues 1-64) separate from the remainder of the CspC protein (residues 65-557, **Figure 2A**).  
409 CspC was undetectable in the L64<sub>TAG</sub> mutant in western blot analyses of sporulating cells or  
410 purified spores (**Figure 2B**), suggesting that the CspC prodomain cannot function *in trans* unlike  
411 CspB [23] and other subtilisin-like serine proteases [27].

412         However, an important caveat to our prior finding that the CspB prodomain could  
413 function *in trans* was that these studies used plasmid over-expression [23]. Given that we  
414 recently determined that plasmid-based *cspBA-cspC* over-expression constructs can cause  
415 experimental artifacts [25, 31], we tested whether chromosomally encoding the CspB prodomain  
416 *in trans* would allow for complementation of a *cspBA* deletion strain (Q66<sub>TAG</sub>, **Figure S1A**).  
417 CspBA was detectable in sporulating cells of the Q66<sub>TAG</sub> complementation strain, albeit at  
418 reduced levels relative to wild type and the wild-type *cspBA* complementation strain presumably  
419 because the chaperone activity of an intramolecular chaperone is more efficient than an  
420 intermolecular chaperone (**Figure S1B**). Regardless, these results indicate that the CspB protease  
421 can still fold properly when its prodomain is supplied *in trans* even when *cspBA*<sub>Q66-TAG</sub> is  
422 expressed from the chromosome rather than a plasmid.

423         To assess how the decreased CspBA levels in the Q66<sub>TAG</sub> complementation strain would  
424 affect CspB, CspA, and CspC levels in mature Q66<sub>TAG</sub> spores (**Figure S1B**), we analyzed the  
425 levels of these proteins in purified spores by western blotting. Consistent with our prior report  
426 that CspB and CspA are needed to incorporate and/or stabilize CspC in mature spores [25, 31],

427 reduced levels of CspB, CspA, and CspC were observed in Q66<sub>TAG</sub> spores. Importantly, the  
428 Q66<sub>TAG</sub> construct largely complemented the germination defect of the parental  $\Delta cspBA$  strain,  
429 increasing the number of germinating spores by 1000-fold relative to  $\Delta cspBA$  ( $p < 0.0001$ ) and  
430 only 2-fold lower than wild-type spores ( $p < 0.01$ ). We next tested whether the reduced levels of  
431 Csp proteins affected germinant sensitivity. Surprisingly, the greatly reduced levels of all three  
432 Csp proteins in Q66<sub>TAG</sub> spores resulted in only a ~2-fold defect in spore germination relative to  
433 wild type on 0.1% taurocholate plates and only a ~4-fold decrease at the lowest concentration of  
434 taurocholate tested (0.001%, **Figure S1C**,  $p < 0.005$ ). This result suggests that Csp proteins are  
435 present in excess of what is needed to respond to germinant signals.

436

#### 437 **Resurrection of CspA's active site does not restore enzymatic function**

438 Our finding that the CspC pseudoprotease could not be resurrected by restoring its  
439 catalytic triad was perhaps not entirely surprising given that the degenerate site residues, Thr170  
440 and Gly485, are strictly conserved across the Peptostreptococcaceae family ([25], **Figure 1B**). In  
441 contrast, the degenerate site mutations in CspA's active site region are not strictly conserved,  
442 with Peptostreptococcaceae family members encoding CspA domains that carry either one or  
443 two mutations in residues of the catalytic triad and occasionally none at all (**Figure 1**) within the  
444 context of CspBA fusion proteins. Since some Peptostreptococcaceae variants appear to encode  
445 active CspA domains, *C. difficile* CspA might tolerate degenerate site mutations more readily  
446 than CspC. Despite the sequence variation observed around the CspA degenerate site among  
447 Peptostreptococcaceae family members, modeling this degenerate site using iTasser [42]  
448 indicated that the CspA pseudoprotease should have high structural homology to the CspC  
449 pseudoprotease (**Figure 1C**) and CspB proteases. Thus, we tested whether CspA could be

450 converted back into an active protease by using allele-coupled exchange [34] to restore the  
451 catalytic triad of CspA. In particular, we cloned complementation constructs encoding amino  
452 acid substitutions of glutamine 757 to histidine (Q757H) and alanine 1064 to serine (A1064S)  
453 both individually and in combination. In contrast with the CspC degenerate site mutants (**Figure**  
454 **2**), CspA degenerate site mutants did not affect CspBA levels in sporulating cells even in the  
455 mutant carrying an intact catalytic triad (*BA<sub>2xcat</sub>*, **Figure 4A**). It should be noted that in  
456 sporulating cells, CspBA is the predominant form observed, while CspA is separated from CspB  
457 in mature spores through the action of the YabG protease [23]. Notably, the degenerate site  
458 mutations did not affect CspBA function, since all three degenerate site mutants made functional,  
459 heat-resistant spores at wild-type levels (**Figure 4A**). Nevertheless, despite folding normally, the  
460 *cspBA 2xcat* mutant failed to undergo autoprocessing, indicating that restoring the catalytic triad  
461 was not sufficient to convert CspA into an active protease (**Figure 4A**).

462         Since CspB and CspA are separated from each other in mature spores [25], we  
463 considered the possibility that autoprocessing of CspA in the *BA<sub>2xcat</sub>* double mutant might occur  
464 during spore maturation after YabG-mediated cleavage, so we analyzed the sizes and amount of  
465 CspB, CspA, and CspC in purified spores by western blotting. CspA<sub>2xcat</sub> was detected at wild-  
466 type levels and at the expected size in degenerate site mutant spores (**Figure 4B**), confirming that  
467 CspA still does not undergo autoprocessing even if its catalytic triad is intact. CspB and CspC  
468 sizes and levels were similarly unaffected in the CspA degenerate site mutants (**Figure 4B**), and  
469 the mutant spores germinated with similar efficiency as wild type on rich media plates containing  
470 taurocholate germinant (**Figure 4B**). When measuring germination in the optical density-based  
471 germination assay, the mutant spores also exhibited similar drops in optical density relative to  
472 the wild-type *cspBA* complementation strain ( $\Delta cspBA/cspBA$ ), although they germinated slightly

473 slower than wild-type spores in this assay (**Figure 4C**). Taken together, these results indicate that  
474 factors beyond CspA's degenerate catalytic triad prevent the CspA pseudoprotease from  
475 functioning as an active protease and that CspA can tolerate mutations in its degenerate site  
476 region more readily than CspC.

477 While the inability to resurrect CspA's protease activity likely reflects structural  
478 differences between the *C. difficile* CspA pseudoprotease and active Csp proteins in other  
479 clostridial organisms, an unknown inhibitory factor in *C. difficile* could prevent CspA<sub>2xcat</sub> from  
480 acquiring autoprocessing activity. To test this possibility, we cloned codon-optimized degenerate  
481 site mutant alleles of *cspBA* into vectors for IPTG-inducible recombinant protein production in  
482 *E. coli*. We then measured CspBA-His<sub>6</sub> variant production and purification levels in *E. coli*.  
483 Constructs encoding full-length CspBA were generated to reflect the form of CspA first  
484 produced in *C. difficile* sporulating cells, and producing CspA in the absence of CspB appears to  
485 destabilize CspA in sporulating *C. difficile* cells [31] and renders CspA largely insoluble in *E.*  
486 *coli* (data not shown).

487 CspBA<sub>2xcat</sub>-His<sub>6</sub> was produced and purified at wild-type levels based on Coomassie  
488 staining (**Figure 5A**) and western blotting analyses (**Figure 5B**) in contrast with CspC<sub>2xcat</sub>-His<sub>6</sub>.  
489 However, similar to CspC<sub>2xcat</sub>-His<sub>6</sub>, no CspA autoprocessing was observed in CspBA<sub>2xcat</sub> (**Figure**  
490 **5**), which would have led to CspA becoming separated from CspB. Unexpectedly, marked  
491 decreases in full-length CspBA<sub>Q757H</sub> were observed in the IPTG-induced fraction compared to  
492 wild-type and the other CspBA variants. CspBA<sub>Q757H</sub> appeared to be susceptible to protease  
493 cleavage in *E. coli* based on its altered banding pattern in the elution fraction relative to wild-  
494 type and the other CspBA variants (**Figure 5**). However, since the Q757H mutation did not  
495 affect CspBA size or function in *C. difficile* (**Figure 4a**), the point mutation likely alters the

496 conformation of CspBA such that it is more susceptible to proteases present in *E. coli* but not *C.*  
497 *difficile*. Taken together, this data demonstrates that intrinsic structural features within the CspA  
498 pseudoprotease prevent it from being converted to a functional enzyme, even when its catalytic  
499 triad is restored.

500

## 501 **Discussion**

502 Pseudoenzymes have increasingly been recognized as crucial regulators of numerous  
503 cellular processes despite their lack of enzymatic activity [5]. These catalytically inactive  
504 variants most frequently arise from gene duplications followed by catalytic site inactivating  
505 mutations that then enable the pseudoenzyme to acquire a new non-enzymatic function [6, 7].  
506 The extent to which a given pseudoenzyme's function has diverged from its ancestral enzymatic  
507 function varies for the relatively small number of pseudoenzymes in which this question has  
508 been examined, with mutagenesis enabling the revival of enzymatic activity in some but not all  
509 pseudoenzymes [1]. Here, we assessed whether the CspA and CspC pseudoproteases of *C.*  
510 *difficile* could be converted to active proteases through the restoration of their catalytic triads.  
511 We also determined whether mutation of their degenerate site residues impacted CspC and/or  
512 CspA function during *C. difficile* spore germination.

513 Our mutational analyses revealed that restoring the active sites of the pseudoenzymes,  
514 CspC and CspA, did not resurrect protease activity in either pseudoenzyme regardless of whether  
515 the degenerate site mutants (*2xcat*) were produced in *C. difficile* or recombinantly in *E. coli*.  
516 Thus, the CspC and CspA pseudoproteases have both acquired features that prevent protease  
517 activity beyond their catalytic site mutations. Interestingly, the CspC and CspA pseudoproteases  
518 differentially tolerated changes to their degenerate site residues. Restoring CspC's catalytic triad

519 appeared to disrupt protein folding in *E. coli* (**Figure 3**) and *C. difficile* (**Figure 2**), whereas the  
520 equivalent mutations in CspA did not impact CspA folding or function in either organism  
521 (**Figures 4 & 5**). Given that these pseudoproteases tolerate changes in their degenerate sites to  
522 different degrees, our findings raise the question as to how CspC and CspA independently  
523 evolved to become pseudoproteases in *C. difficile* and other Peptostreptococcaceae family  
524 members.

525         In the case of CspC, loss of its catalytic site residues was likely critical to its evolution as  
526 a pseudoprotease. Although the crystal structure of CspC suggests that the substrate binding  
527 pocket can accommodate the catalytic triad residues (**Figure 1**, [32]), restoring these residues  
528 disrupts CspC folding (**Figure 3**). Analysis of the conservation of degenerate site residues in  
529 CspC homologs in the Peptostreptococcaceae family suggests that the chemical properties of its  
530 specific degenerate site residues, namely threonine 170 and glycine 485 in *C. difficile* CspC  
531 (**Figure 1**, [25]), are crucial for the structural integrity of Peptostreptococcaceae family CspC  
532 homologs.

533         Our prodomain transcomplementation experiments further revealed that additional  
534 changes beyond CspC's degenerate site mutations appear to have been necessary for CspC to  
535 evolve its regulatory function during spore germination. Unlike CspB and many other subtilisin-  
536 like serine proteases whose subtilase domains still fold around their prodomains when supplied  
537 *in trans* (**Figure S1**, [23, 27, 44]), the prodomain of CspC lacked chaperone activity when  
538 supplied *in trans* (**Figure 2B**). The requirement for CspC's prodomain to remain physically  
539 tethered to its subtilase domain may reflect the fact that the prodomain of *C. difficile* CspC is  
540 bound more tightly to its subtilase domain than the prodomain of *C. perfringens* CspB [23, 32].  
541 For example, in *C. difficile* CspC, a “clamp” region holds the prodomain in place, while this



542 feature is absent in other subtilisin-like proteases [32]. Lastly, loss-of-function *cspC* alleles  
543 identified in a prior genetic screen by Francis *et al.* [24] cluster to the degenerate site region and  
544 may prevent prodomain binding to the degenerate site region via steric occlusion (**Figure 3A**).  
545 Consistent with this interpretation, the *cspC*<sub>G171R</sub> allele in recombinant CspC exhibited a  
546 substantially reduced purification efficiency from the soluble fraction than wild-type CspC-His<sub>6</sub>  
547 and even relative to the other degenerate site mutants (**Figure 4**). This result strongly suggests  
548 that the loss-of-function CspC mutations identified in the germination mutant screen [24] disrupt  
549 CspC folding and lead to its destabilization in sporulating cells.

550         While CspC structure and function rely critically on the identity of its degenerate site  
551 residues, CspA structure and function were unaffected by mutations that restore the catalytic  
552 triad. This result suggests that loss of CspA's catalytic residues was not an essential step in its  
553 evolution to become a pseudoprotease in *C. difficile*, in contrast with *C. difficile* CspC. While  
554 mutation of catalytic site residues is thought to be the most frequent driving force behind the  
555 evolution of new functions for pseudoenzymes, mutations that prevent substrate binding or  
556 catalysis have also been observed in some pseudoenzymes [6, 7]. It is likely that *C. difficile*'s  
557 CspA pseudoprotease domain has evolved analogous mutations that prevent it from cleaving its  
558 prodomain. It is possible that CspA could have evolved these differences relative to CspC  
559 because CspA plays an additional role in regulating CspC incorporation into spores [25, 31]. In  
560 the absence of a CspA crystal structure, the effect of these mutations remains unclear, but our  
561 results raise the important possibility that CspA domains in Peptostreptococcaeae family CspBA  
562 homologs with an intact catalytic triad (**Figure 1C**) may include mutations that occlude substrate  
563 binding and thus may actually be pseudoproteases.

564           A similar case of pseudoenzymes lacking catalytic activity despite retaining their active  
565 site residues has been observed in the iRhom family of proteins, which are widely conserved,  
566 inactive homologs of rhomboid proteases [6]. While most iRhom pseudoproteases lack either  
567 one or both catalytic dyad residues required for rhomboid protease activity, at least one iRhom  
568 family member carries an intact catalytic dyad yet lacks protease activity [47]. Notably, a  
569 distinguishing feature of iRhoms is the presence of a proline residue adjacent to the catalytic  
570 serine (or degenerate site residue) that is sufficient to prevent proteolytic activity in rhomboid  
571 proteases [47]. Whether a similar type of inactivating residue occurs in the CspA (or CspC)  
572 pseudoproteases in the Peptostreptococcaceae family remains to be determined. Regardless, it is  
573 worth noting that iRhom pseudoproteases carry additional structural features that distinguish  
574 iRhoms from rhomboid proteases beyond the catalytic site mutations [6], namely an extended  
575 cytoplasmic amino terminus and conserved cysteine-rich luminal loop domain.

576           Unlike iRhoms and rhomboid proteases, the CspC pseudoprotease exhibits a high degree  
577 of structural similarity to the CspB protease, with the structures almost being superimposable  
578 (rmsd of  $\sim 1$  Å, [32]). This similarity complicates the prediction of protease activity based on the  
579 presence of an intact catalytic triad, since we observed that a catalytic triad can be restored to the  
580 *C. difficile* CspA pseudoprotease, yet it does not gain enzymatic activity. This observation raises  
581 the possibility that the bioinformatics-based predictions widely used to predict enzyme activity  
582 may over-estimate the prevalence of active enzymes. Indeed, a recent review proposed that  
583 pseudoenzymes be defined as “the predicted catalytically defective counterparts of enzymes  
584 owing to the absence of one or more catalytic residues[3].” Fortunately, considerable attention is  
585 now being directed at improving the curation of pseudoenzymes [48]. Regardless, as more

586 pseudoenzymes are directly studied rather than bioinformatically predicted, it is likely that  
587 additional surprising findings will be made.

588         Indeed, studying CspA autoprocessing activity in Peptostreptococcaceae family members  
589 predicted to encode an active CspA would yield important insights into the evolution of this  
590 pseudoprotease and permit assessment of how widely conserved the Csp protease-  
591 pseudoprotease signaling system is during clostridial spore germination. These studies may also  
592 identify ways to target the *C. difficile* Csp pseudoproteases to prevent spore germination and thus  
593 infection, since this signaling system is critical for *C. difficile* to initiate infection [24, 49, 50].  
594 Importantly, pseudoenzymes can be excellent targets for drug discovery because they often have  
595 distinct features such as remodeled active sites that can be differentially targeted by small  
596 molecules without impacting their active enzyme counterparts [1, 5]. Further elucidating their  
597 critical properties and mechanisms of action may therefore represent a promising avenue for  
598 therapeutic intervention.

599 **Acknowledgments**

600 We would like to thank J. Sorg for generously sharing a codon-optimized versions of *cspA*, *cspB*,  
601 and *cspC* and the anti-CspA antibody; N. Minton (U. Nottingham) for providing us with access  
602 to the 630 $\Delta$ *erm* $\Delta$ *pyrE* strain and pMTL-YN1C and pMTL-YN3 plasmids for allele-coupled  
603 exchange (ACE); and Marcin Dembek for directly providing these materials to us and sharing his  
604 specific protocols on ACE with us.

605

606 **Declarations of Interest**

607 A.S. has a paid consultancy for BioVector, Inc., a diagnostic start-up.

608

609 **Funding Information**

610 Research in this manuscript was funded by Award Number K12 GM133314 to A.E.R., who is a  
611 Tufts IRACDA fellow, and T32 GM007310 to E.R.F., and Award Number R01GM108684 to  
612 A.S from the National Institutes of General Medical Sciences and R21AI26067 to A.S. from the  
613 National Institutes of Allergy and Infectious Disease. A.S. is a Burroughs Wellcome Investigator  
614 in the Pathogenesis of Infectious Disease supported by the Burroughs Wellcome Fund. M.L.D  
615 was supported in part by the Alpha Omega Alpha Carolyn L. Kuckein Student Research  
616 Fellowship. The content is solely the responsibility of the author(s) and does not necessarily  
617 reflect the views of the Burroughs Wellcome Fund, or the National Institutes of Health. The  
618 funders had no role in study design, data collection and interpretation, or the decision to submit  
619 the work for publication.

620

621 **Author Contribution Statement**

622 A.S. conceived the hypothesis and supervised the project with help from A.E.R. M.L.D, E.R.F,  
623 A.E.R., and A.S designed the experiments. A.S. constructed the single degenerate site mutants  
624 for CspC in *C. difficile*, codon-optimized *cspC* mutants carrying single degenerate site mutants,  
625 and codon-optimized *cspBA* expression construct. M.L.D. constructed the double degenerate site  
626 mutant of CspC, all the CspA degenerate site mutants, and *cspBA* codon-optimized expression  
627 constructs encoding degenerate site mutations. E.R.F. cloned the G171R and double degenerate  
628 site mutant expression constructs for codon-optimized CspC. M.L.D. performed the phenotypic  
629 characterization of *C. difficile* strains (heat-resistance, plate-based and optical density-based  
630 germination assays, and western blot analyses) unless otherwise indicated, as well as the *E. coli*  
631 protein purification analyses of CspBA. E.R.F. performed the *E. coli* protein purification  
632 analyses of CspC. A.S. performed the phenotypic analyses of the *cspBA* prodomain trans-  
633 complementation analyses. M.L.D and A.S. wrote the manuscript with help from A.E.R. and  
634 E.R.F.

635

## 636 **References**

- 637 1 Murphy, J. M., Farhan, H. and Eyers, P. A. (2017) Bio-Zombie: the rise of  
638 pseudoenzymes in biology. *Biochem Soc Trans.* **45**, 537-544
- 639 2 Pils, B. and Schultz, J. (2004) Inactive enzyme-homologues find new function in  
640 regulatory processes. *J Mol Biol.* **340**, 399-404
- 641 3 Ribeiro, A. J. M., Das, S., Dawson, N., Zaru, R., Orchard, S., Thornton, J. M., Orengo,  
642 C., Zeqiraj, E., Murphy, J. M. and Eyers, P. A. (2019) Emerging concepts in pseudoenzyme  
643 classification, evolution, and signaling. *Sci Signal.* **12**
- 644 4 Eyers, P. A. and Murphy, J. M. (2016) The evolving world of pseudoenzymes: proteins,  
645 prejudice and zombies. *BMC Biol.* **14**, 98
- 646 5 Murphy, J. M., Mace, P. D. and Eyers, P. A. (2017) Live and let die: insights into  
647 pseudoenzyme mechanisms from structure. *Curr Opin Struct Biol.* **47**, 95-104
- 648 6 Adrain, C. and Freeman, M. (2012) New lives for old: evolution of pseudoenzyme  
649 function illustrated by iRhoms. *Nature reviews. Molecular cell biology.* **13**, 489-498
- 650 7 Todd, A. E., Orengo, C. A. and Thornton, J. M. (2002) Sequence and structural  
651 differences between enzyme and nonenzyme homologs. *Structure.* **10**, 1435-1451

- 652 8 Wishart, M. J., Denu, J. M., Williams, J. A. and Dixon, J. E. (1995) A single mutation  
653 converts a novel phosphotyrosine binding domain into a dual-specificity phosphatase. *J Biol*  
654 *Chem.* **270**, 26782-26785
- 655 9 Wishart, M. J. and Dixon, J. E. (1998) Gathering STYX: phosphatase-like form predicts  
656 functions for unique protein-interaction domains. *Trends Biochem Sci.* **23**, 301-306
- 657 10 Katso, R. M., Russell, R. B. and Ganesan, T. S. (1999) Functional analysis of H-Ryk, an  
658 atypical member of the receptor tyrosine kinase family. *Mol Cell Biol.* **19**, 6427-6440
- 659 11 Prigent, S. A. and Gullick, W. J. (1994) Identification of c-erbB-3 binding sites for  
660 phosphatidylinositol 3'-kinase and SHC using an EGF receptor/c-erbB-3 chimera. *EMBO J.* **13**,  
661 2831-2841
- 662 12 Shi, F., Telesco, S. E., Liu, Y., Radhakrishnan, R. and Lemmon, M. A. (2010)  
663 ErbB3/HER3 intracellular domain is competent to bind ATP and catalyze autophosphorylation.  
664 *Proc Natl Acad Sci U S A.* **107**, 7692-7697
- 665 13 Childers, W. S., Xu, Q., Mann, T. H., Mathews, II, Blair, J. A., Deacon, A. M. and  
666 Shapiro, L. (2014) Cell fate regulation governed by a repurposed bacterial histidine kinase. *PLoS*  
667 *Biol.* **12**, e1001979
- 668 14 Abt, M. C., McKenney, P. T. and Pamer, E. G. (2016) *Clostridium difficile* colitis:  
669 pathogenesis and host defence. *Nat Rev Microbiol*
- 670 15 Rupnik, M., Wilcox, M. and Gerding, D. (2009) *Clostridium difficile* infection: new  
671 developments in epidemiology and pathogenesis. *Nat Rev Microbiol.* **7**, 526-536
- 672 16 Lessa, F. C., Mu, Y., Bamberg, W. M., Beldavs, Z. G., Dumyati, G. K., Dunn, J. R.,  
673 Farley, M. M., Holzbauer, S. M., Meek, J. I., Phipps, E. C., Wilson, L. E., Winston, L. G.,  
674 Cohen, J. A., Limbago, B. M., Fridkin, S. K., Gerding, D. N. and McDonald, L. C. (2015)  
675 Burden of *Clostridium difficile* infection in the United States. *N Engl J Med.* **372**, 825-834
- 676 17 (CDC), C. f. D. C. (2019) Antibiotic Resistance Threats in the United States.  
677 <https://www.cdc.gov/drugresistance/biggest-threats.html>
- 678 18 Giordano, N., Hastie, J. L. and Carlson, P. E. (2018) Transcriptomic profiling of  
679 *Clostridium difficile* grown under microaerophilic conditions. *Pathog Dis.* **76**
- 680 19 Paredes-Sabja, D., Shen, A. and Sorg, J. A. (2014) *Clostridium difficile* spore biology:  
681 sporulation, germination, and spore structural proteins. *Trends Microbiol.* **22**, 406-416
- 682 20 Shen, A. (2015) A Gut Odyssey: The Impact of the Microbiota on *Clostridium difficile*  
683 Spore Formation and Germination. *PLoS pathogens.* **11**, e1005157
- 684 21 Kochan, T. J., Foley, M. H., Shoshiev, M. S., Somers, M. J., Carlson, P. E. and Hanna, P.  
685 C. (2018) Updates to *Clostridium difficile* Spore Germination. *J Bacteriol.* **200**
- 686 22 Bhattacharjee, D., McAllister, K. N. and Sorg, J. A. (2016) Germinants and Their  
687 Receptors in Clostridia. *J Bacteriol.* **198**, 2767-2775
- 688 23 Adams, C. M., Eckenroth, B. E., Putnam, E. E., Doublet, S. and Shen, A. (2013)  
689 Structural and functional analysis of the CspB protease required for *Clostridium* spore  
690 germination. *PLoS Pathogens.* **9**, e1003165
- 691 24 Francis, M. B., Allen, C. A., Shrestha, R. and Sorg, J. A. (2013) Bile acid recognition by  
692 the *Clostridium difficile* germinant receptor, CspC, is important for establishing infection. *PLoS*  
693 *Pathogens.* **9**, e1003356
- 694 25 Kevorkian, Y., Shirley, D. J. and Shen, A. (2015) Regulation of *Clostridium difficile*  
695 spore germination by the CspA pseudoprotease domain. *Biochimie.* **122**. 243-254.

- 696 26 Shrestha, R., Cochran, A. M. and Sorg, J. A. (2019) The requirement for co-germinants  
697 during *Clostridium difficile* spore germination is influenced by mutations in *yabG* and *cspA*.  
698 PLoS Pathogens. **15**, e1007681
- 699 27 Shinde, U. and Thomas, G. (2011) Insights from bacterial subtilases into the mechanisms  
700 of intramolecular chaperone-mediated activation of furin. *Methods Mol Biol.* **768**, 59-106
- 701 28 Shimamoto, S., Moriyama, R., Sugimoto, K., Miyata, S. and Makino, S. (2001) Partial  
702 characterization of an enzyme fraction with protease activity which converts the spore  
703 peptidoglycan hydrolase (SleC) precursor to an active enzyme during germination of *Clostridium*  
704 *perfringens* S40 spores and analysis of a gene cluster involved in the activity. *J Bacteriol.* **183**,  
705 3742-3751
- 706 29 Paredes-Sabja, D., Setlow, P. and Sarker, M. R. (2011) Germination of spores of  
707 Bacillales and Clostridiales species: mechanisms and proteins involved. *Trends Microbiol.* **19**,  
708 85-94
- 709 30 Fimlaid, K. A., Jensen, O., Donnelly, M. L., Francis, M. B., Sorg, J. A. and Shen, A.  
710 (2015) Identification of a Novel Lipoprotein Regulator of *Clostridium difficile* Spore  
711 Germination. *PLoS Pathogens.* **11**, e1005239.
- 712 31 Kevorkian, Y. and Shen, A. (2017) Revisiting the Role of Csp Family Proteins in  
713 Regulating *Clostridium difficile* Spore Germination. *J Bacteriol.* **199**
- 714 32 Rohlfsing, A. E., Eckenroth, B. E., Forster, E. R., Kevorkian, Y., Donnelly, M. L., Benito  
715 de la Puebla, H., Doublet, S. and Shen, A. (2019) The CspC pseudoprotease regulates  
716 germination of *Clostridioides difficile* spores in response to multiple environmental signals.  
717 *PLoS Genet.* **15**, e1008224
- 718 33 Talukdar, P. K. and Sarker, M. R. (2020) The serine proteases CspA and CspC are  
719 essential for germination of spores of *Clostridium perfringens* SM101 through activating SleC  
720 and cortex hydrolysis. *Food Microbiol.* **86**, 103325
- 721 34 Ng, Y. K., Ehsaan, M., Philip, S., Collery, M. M., Janoir, C., Collignon, A., Cartman, S.  
722 T. and Minton, N. P. (2013) Expanding the repertoire of gene tools for precise manipulation of  
723 the *Clostridium difficile* genome: allelic exchange using *pyrE* alleles. *PloS one.* **8**, e56051
- 724 35 Horton, R., Hunt, H., Ho, S., Pullen, J. and Pease, L. (1989) Engineering hybrid genes  
725 without the use of restriction enzymes: gene splicing by overlap extension. *Gene.* **77**, 61-68
- 726 36 Donnelly, M. L., Li, W., Li, Y. Q., Hinkel, L., Setlow, P. and Shen, A. (2017) A  
727 *Clostridium difficile*-Specific, Gel-Forming Protein Required for Optimal Spore Germination.  
728 *mBio.* **8**
- 729 37 Ribis, J. W., Ravichandran, P., Putnam, E. E., Pishdadian, K. and Shen, A. (2017) The  
730 Conserved Spore Coat Protein SpoVM Is Largely Dispensable in *Clostridium difficile* Spore  
731 Formation. *mSphere.* **2**
- 732 38 Shen, A., Fimlaid, K. A. and Pishdadian, K. (2016) Inducing and Quantifying  
733 *Clostridium difficile* Spore Formation. *Methods Mol Biol.* **1476**, 129-142
- 734 39 Donnelly, M. L., Fimlaid, K. A. and Shen, A. (2016) Characterization of *Clostridium*  
735 *difficile* Spores Lacking Either SpoVAC or Dipicolinic Acid Synthetase. *J Bacteriol.* **198**, 1694-  
736 1707
- 737 40 Putnam, E. E., Nock, A. M., Lawley, T. D. and Shen, A. (2013) SpoIVA and SipL are  
738 *Clostridium difficile* spore morphogenetic proteins. *J Bacteriol.* **195**, 1214-1225
- 739 41 Fimlaid, K. A., Bond, J. P., Schutz, K. C., Putnam, E. E., Leung, J. M., Lawley, T. D. and  
740 Shen, A. (2013) Global Analysis of the Sporulation Pathway of *Clostridium difficile*. *PLoS*  
741 *Genet.* **9**, e1003660

- 742 42 Yang, J. and Zhang, Y. (2015) Protein Structure and Function Prediction Using I-  
743 TASSER. *Curr Protoc Bioinformatics*. **52**, 5 8 1-15
- 744 43 Rawlings, N. D., Barrett, A. J., Thomas, P. D., Huang, X., Bateman, A. and Finn, R. D.  
745 (2018) The MEROPS database of proteolytic enzymes, their substrates and inhibitors in 2017  
746 and a comparison with peptidases in the PANTHER database. *Nucleic Acids Res.* **46**, D624-  
747 D632
- 748 44 Shinde, U. and Inouye, M. (2000) Intramolecular chaperones: polypeptide extensions that  
749 modulate protein folding. *Semin Cell Dev Biol.* **11**, 35-44
- 750 45 Paidhungat, M. and Setlow, P. (2000) Role of Ger proteins in nutrient and nonnutrient  
751 triggering of spore germination in *Bacillus subtilis*. *J Bacteriol.* **182**, 2513-2519
- 752 46 Sturm, A. and Dworkin, J. (2015) Phenotypic Diversity as a Mechanism to Exit Cellular  
753 Dormancy. *Curr Biol.* **25**, 2272-2277
- 754 47 Lemberg, M. K. and Freeman, M. (2007) Functional and evolutionary implications of  
755 enhanced genomic analysis of rhomboid intramembrane proteases. *Genome Res.* **17**, 1634-1646
- 756 48 Zaru, R., Magrane, M., Orchard, S. and UniProt, C. (2019) Challenges in the annotation  
757 of pseudoenzymes in databases: the UniProtKB approach. *FEBS J*
- 758 49 Howerton, A., Patra, M. and Abel-Santos, E. (2013) A new strategy for the prevention of  
759 *Clostridium difficile* infection. *The Journal of infectious diseases.* **207**, 1498-1504
- 760 50 Howerton, A., Seymour, C. O., Murugapiran, S. K., Liao, Z., Phan, J. R., Estrada, A.,  
761 Wagner, A. J., Mefferd, C. C., Hedlund, B. P. and Abel-Santos, E. (2018) Effect of the Synthetic  
762 Bile Salt Analog CamSA on the Hamster Model of *Clostridium difficile* Infection. *Antimicrob*  
763 *Agents Chemother.* **62**
- 764
- 765



766 **Figure Legends**

767

768 **Figure 1. Csp family subtilisin-like serine proteases in the Clostridia.** (A) Schematic of the  
769 active Csp proteases encoded by *C. perfringens*, CspA, CspB and CspC, compared to  
770 *Clostridiodes difficile* Csp proteins, where the active CspB protease is fused to an inactive CspA  
771 pseudoprotease domain, and CspC is also a pseudoprotease. “Pro” denotes the prodomain that  
772 functions as an intramolecular chaperone. Catalytic triad residues aspartic acid (D), histidine (H)  
773 and serine (S) are shown in black; degenerate site residues are shown in red (glutamine (Q),  
774 aspartic acid (A), threonine (T), and glycine (G)). The scissor icon marks autoprocessing of Csp  
775 prodomains, whereas the dotted line indicates where the prodomain would be autoprocessed if  
776 the CspC pseudoprotease were to become active. The proposed YabG cleavage site around  
777 residues SQRS [26] is shown between CspB and CspA. (B) Sequence logos of the catalytic triad  
778 residue regions for CspBA and CspC of the Peptostreptococcaceae family. Regions shown  
779 correspond to the MEROPS protease database [43] definitions for the peptidase family S8A.  
780 Information regarding gene location and accession number for the proteins is included in the  
781 sequence logo analysis provided in Table S3. (C) Cartoon model of the active/degenerate site  
782 regions of either *C. perfringens* CspB (grey, PDB 4I0W) aligned to *C. difficile* CspC (cyan, PDB  
783 6MW4) or CspB (grey, PDB 4I0W) aligned to *C. difficile* CspA iTasser model (periwinkle),  
784 active site region. The cleaved prodomain of CspB is shown in dark magenta compared to the  
785 uncleaved prodomain of CspC (pink) and CspA prodomain (light pink).

786

787 **Figure 2: Restoring active site residues to CspC appears to result in its destabilization.** (A)

788 Schematic of wild-type CspC and a construct encoding the prodomain of CspC *in trans* (L64-

789 TAG). The dotted line indicates where the prodomain would be autoprocessed if the CspC  
790 pseudoprotease were to become active. “Pro” denotes the prodomain. L64-TAG encodes a  
791 variant in which the CspC prodomain is produced *in trans* from the remainder of CspC through  
792 the introduction of a stop codon after codon 64 and a ribosome binding site and start codon  
793 before codon 65. (B) Western blot analyses of CspB(A) and CspC in sporulating cells and  
794 purified spores from wild type 630 $\Delta$ *erm-p*,  $\Delta$ *cspC*, and  $\Delta$ *cspC* complemented with either wild-  
795 type *cspC* or the L64-TAG *cspC* trans-complementation variant. *2xcat* refers to a  
796 complementation construct containing both the T170H and G485S point mutations.  $\Delta$ *spo0A*  
797 ( $\Delta$ 0A) was used as a negative control for sporulating cells. SpoIVA was used as a loading control  
798 for sporulating cells, while CotA was used as a loading control for purified spores. An anti-CspB  
799 antibody was used to detect full-length CspBA in sporulating cells, whereas CspB is detected in  
800 purified spores [23]. The germination efficiency of spores from the indicated strains plated on  
801 BHIS media containing 0.1% taurocholate is also shown relative to wild type. The mean and  
802 standard deviations shown are based on multiple technical replicates performed on two  
803 independent spore purifications for purified spores. Statistical significance relative to wild type  
804 was determined using a one-way ANOVA and Tukey’s test. (C) Change in the OD<sub>600</sub> in response  
805 to germinant of CspC catalytic mutant spores relative to wild-type spores.  $\Delta$ *cspC* mutant spores  
806 serve as a negative control. *2xcat* mutant spores are not shown as they behaved similarly to the  
807  $\Delta$ *cspC* spores in the less sensitive plate-based assay. Purified spores were resuspended in BHIS,  
808 and germination was induced by adding taurocholate (1% final concentration). The ratio of the  
809 OD<sub>600</sub> of each strain at a given time point relative to the OD<sub>600</sub> at time zero is plotted. The mean  
810 of three assays from at least 2 independent spore preparations are shown. The error bars indicate  
811 the standard deviation for each time point measured. Statistical significance relative to wild type

812 was determined using a two-way ANOVA and Tukey's test. (D) Germinant sensitivity of CspC  
813 catalytic mutant spores compared to wild type. Spores were plated on BHIS containing  
814 increasing concentrations of taurocholate. The number of colony forming units (CFUs) produced  
815 by germinating spores is shown. The mean and standard deviations shown are based on multiple  
816 replicates performed on two independent spore purifications. Statistical significance relative to  
817 wild type was determined using a one-way ANOVA and Tukey's test. \*\*\*\*  $p < 0.0001$ , \*\*\*  $p <$   
818  $0.001$ , \*\*  $p < 0.01$ .

819

820 **Figure 3. Restoring CspC's catalytic triad appears to impair protein folding in *E. coli*.** (A)

821 CspC space fill model with jelly roll domain in cyan, prodomain in pink and subtilase domain in  
822 grey. Residues identified as being required for *C. difficile* spore germination by Francis et al.

823 [24] in a genetic screen are shown in black. The S443N mutation was identified in combination  
824 with V272G. The degenerate site residues Thr170 and Gly485 are shown in blue. (B)

825 Purification of CspC-His<sub>6</sub> variants from the soluble fraction. G171R was included because this  
826 mutation had been predicted to destabilize CspC by steric occlusion [21, 32]. Cultures expressing  
827 the *cspC* variants were induced with IPTG overnight at 18°C, and aliquots were removed for  
828 analysis of the "induced" fraction. Cultures were harvested, and cells were lysed using  
829 sonication. Following a high-speed centrifugation, the cleared lysate containing soluble proteins  
830 was incubated with Ni<sup>2+</sup>-NTA agarose beads. CspC-His<sub>6</sub> variants were eluted from the beads  
831 using imidazole (elution fraction). Equivalent volumes of samples were resolved by SDS-PAGE  
832 and analyzed by western blotting (top) and Coomassie staining (bottom).

833

834 **Figure 4. Restoring CspA's catalytic triad in *C. difficile* does not resurrect its protease**  
835 **activity or impact CspBA levels or function.** (A) Western blot analyses of CspB(A) and CspC  
836 in sporulating cells from wild type 630 $\Delta$ *erm-p*,  $\Delta$ *cspBA*, and  $\Delta$ *cspBA* complemented with either  
837 wild-type *cspBA* or the *cspBA* catalytic variant (*2xcat*). CspBA is shown with anti-CspB  
838 antibody and anti-CspA antibody.  $\Delta$ *spo0A* ( $\Delta$ *0A*) was used as a negative control for sporulating  
839 cells. Anti-SpoIVA was used as a loading control for sporulating cells. (B) Western blot analyses  
840 of CspA, CspB and CspC in purified spores from wild type 630 $\Delta$ *erm-p*,  $\Delta$ *cspBA*, and  $\Delta$ *cspBA*  
841 complemented with either wild-type *cspBA* or the *cspBA* catalytic variant (*2xcat*). CotA was used  
842 as a loading control for purified spores. The germination efficiency of spores from the indicated  
843 strains plated on BHIS media containing 0.1% taurocholate is also shown relative to wild type.  
844 The mean and standard deviations shown are based on multiple technical replicates performed on  
845 two independent spore purifications. Statistical significance relative to wild type was determined  
846 using a one-way ANOVA and Tukey's test. (C) Change in the OD<sub>600</sub> in response to germination of  
847 CspBA catalytic mutant spores relative to wild-type spores.  $\Delta$ *cspBA* mutant spores served as a  
848 negative control. Purified spores were resuspended in BHIS, and germination was induced by  
849 adding taurocholate (1% final concentration). The ratio of the OD<sub>600</sub> of each strain at a given  
850 time point relative to the OD<sub>600</sub> at time zero is plotted. The mean of three independent assays  
851 from at least 2 independent spore preparations are shown. The error bars indicate the standard  
852 deviation for each time point measured. Statistical significance relative to wild type was  
853 determined using a two-way ANOVA and Tukey's test. \*\*\*\* p < 0.0001, \*\*\* p < 0.001, \*\* p <  
854 0.01  
855

856 **Figure 5. Resurrection of the CspA active site does not restore protease activity in *E. coli*.**

857 (A) Purification of CspBA variants from the soluble fraction. Cultures expressing the *cspBA*  
858 variants were induced with IPTG overnight at 18°C, and aliquots were removed for analysis of  
859 the “induced” fraction compared to the “uninduced” fraction prior to the addition of IPTG (-  
860 IPTG). Cultures were harvested, and cells were lysed using sonication. Following a high-speed  
861 centrifugation, the cleared lysate containing soluble proteins was incubated with Ni<sup>2+</sup>-NTA  
862 agarose beads. CspBA-His<sub>6</sub> variants were eluted from the beads using imidazole (elution  
863 fraction). Samples were resolved by SDS-PAGE and analyzed by Coomassie staining (top) and  
864 western blotting (bottom). Non-specific proteins pulled-down with the Ni-NTA beads are  
865 marked with asterisks; a truncated CspBA Q757H variant is also marked. Anti-CspB antibody  
866 was used to detect full-length CspBA. Anti-His antibody was used to detect CspBA-His<sub>6</sub>  
867 variants.

868

869 **Supplemental figure 1: The CspB prodomain can be supplied *in trans* to reconstitute CspB**  
870 **function and largely complements for loss of CspBA.**

871 (A) Schematic of wild-type CspBA and a construct encoding the prodomain *in trans* (Q66<sub>TAG</sub>).  
872 “Pro” denotes the prodomain. Q66-TAG encodes a variant in which the CspB prodomain is  
873 produced *in trans* from the remainder of CspBA through the introduction of a stop codon after  
874 codon 66 and a ribosome binding site and start codon before codon 67. (B) Western blot analyses  
875 of CspB(A) and CspC in sporulating cells and purified spores from wild type 630Δ*erm-p*,  
876 Δ*cspBA*, and Δ*cspBA* complemented with either wild-type *cspBA* or the *cspBA* trans-  
877 complementation variant. A-P refers to CspB(A) that has undergone autoprocessing to release  
878 the CspB prodomain. Δ*spo0A* (Δ*0A*) was used as a negative control for sporulating cells. SpoIVA

879 was used as a loading control for sporulating cells, while CotA was used as a loading control for  
880 purified spores. An anti-CspB antibody was used to detect full-length CspBA in sporulating  
881 cells. A non-specific band in the anti-CspB blot is indicated with an asterisk. The germination  
882 efficiency of spores from the indicated strains plated on BHIS media containing 0.1%  
883 taurocholate is also shown relative to wild type. The mean and standard deviations shown are  
884 based on multiple replicates performed on two independent spore purifications. Statistical  
885 significance relative to wild type was determined using a one-way ANOVA and Tukey's test.  
886 (C) Germinant sensitivity of Q66<sub>TAG</sub> spores plated on BHIS containing increasing concentrations  
887 of taurocholate. The number of colony forming units (CFUs) produced by germinating spores is  
888 shown. The mean and standard deviations shown are based on multiple replicates performed on  
889 two independent spore purifications. Statistical significance relative to wild type was determined  
890 using a one-way ANOVA and Tukey's test. \*\*\*\* p < 0.0001, \*\*\* p < 0.001, \*\*p < 0.01.  
891

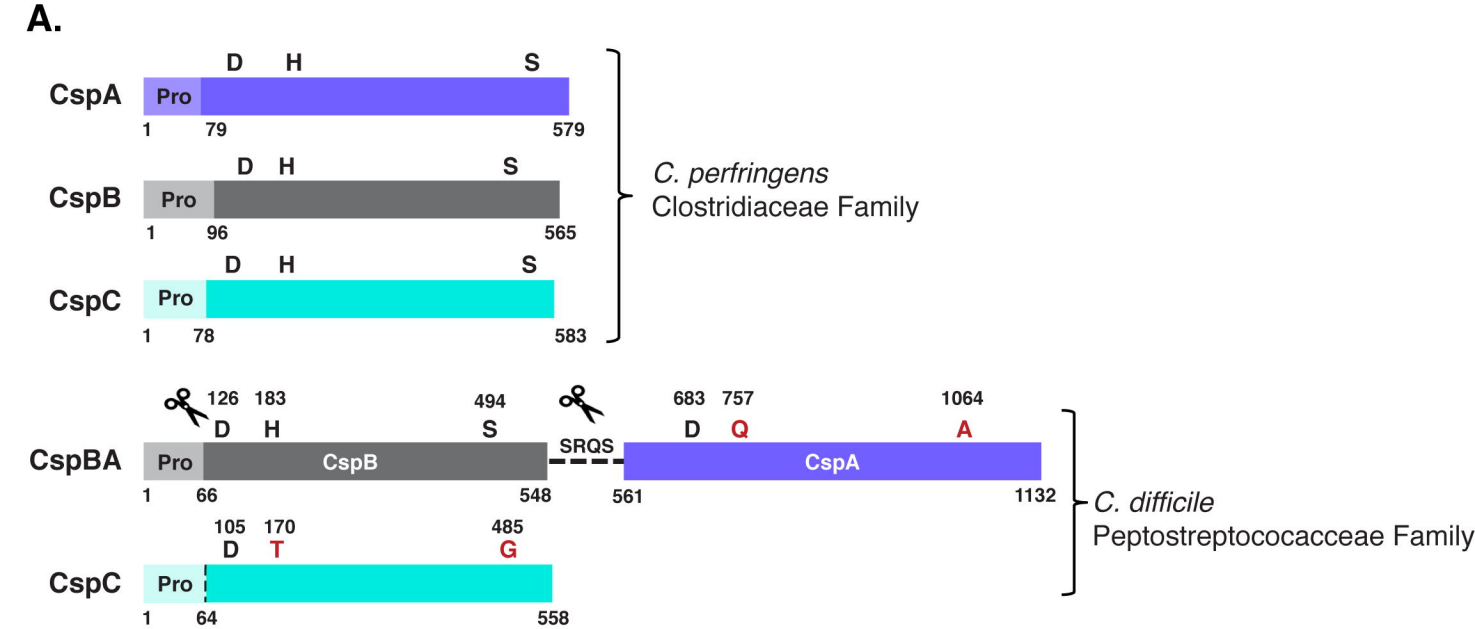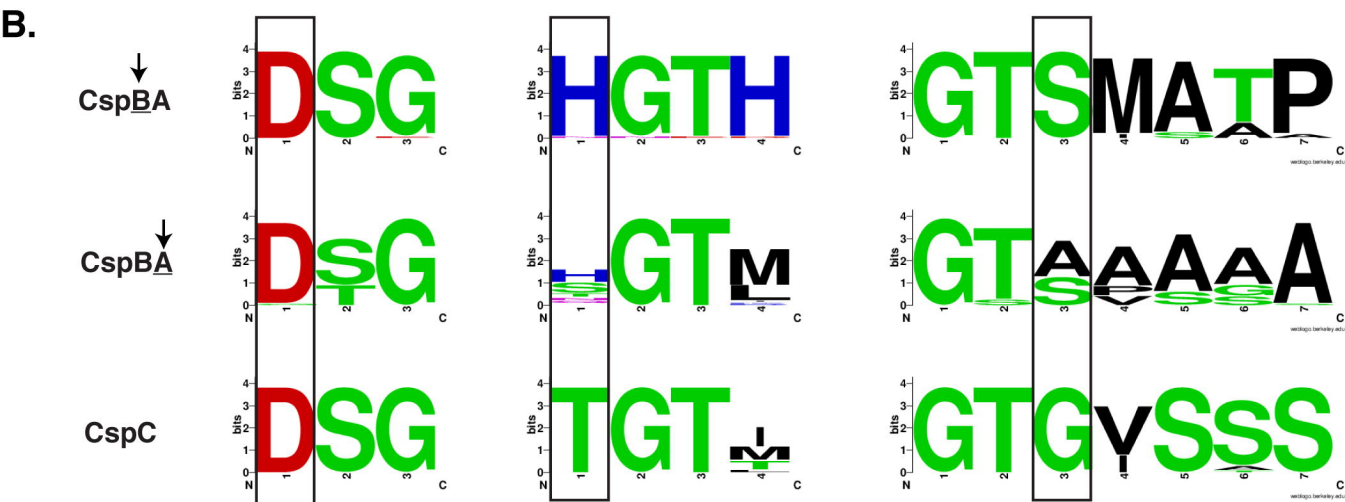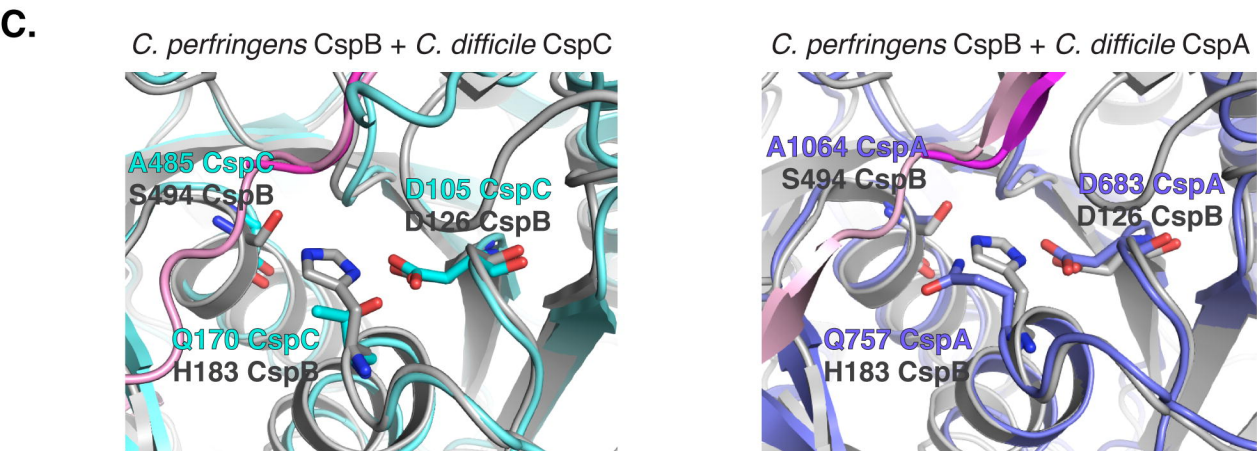

Figure 1. Csp family subtilisin-like serine proteases in the Clostridia.

**A.**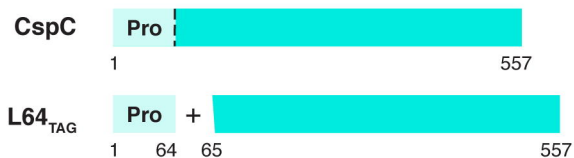**B.**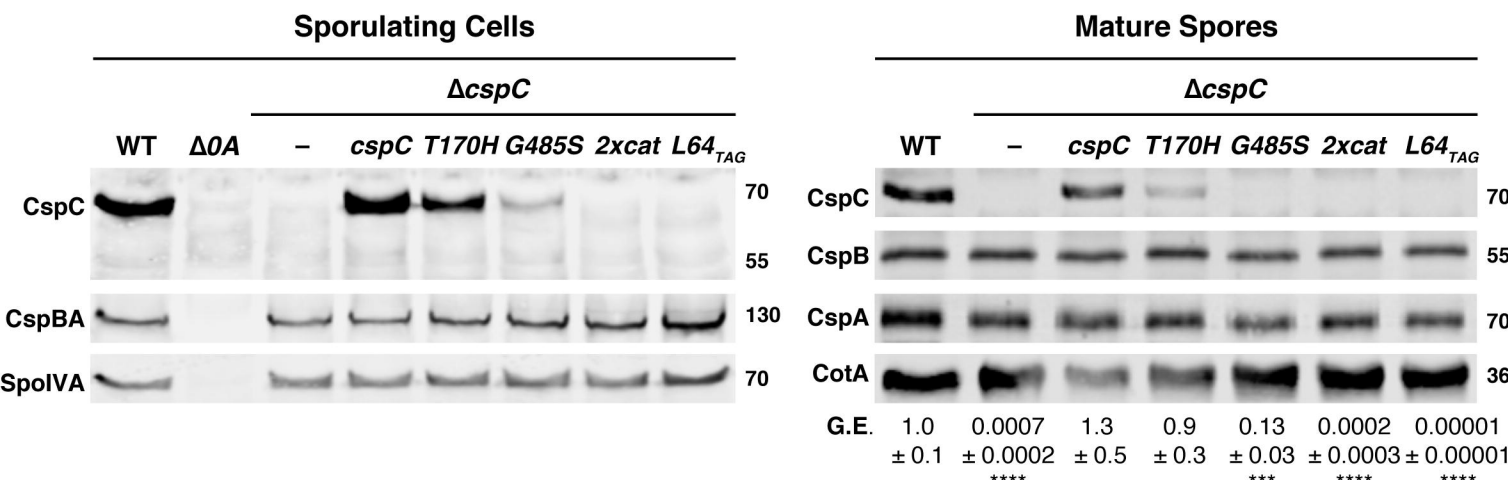**C.**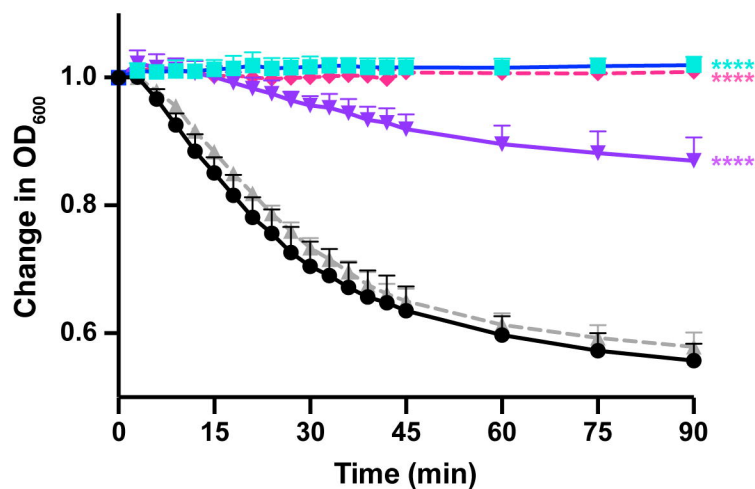**D.**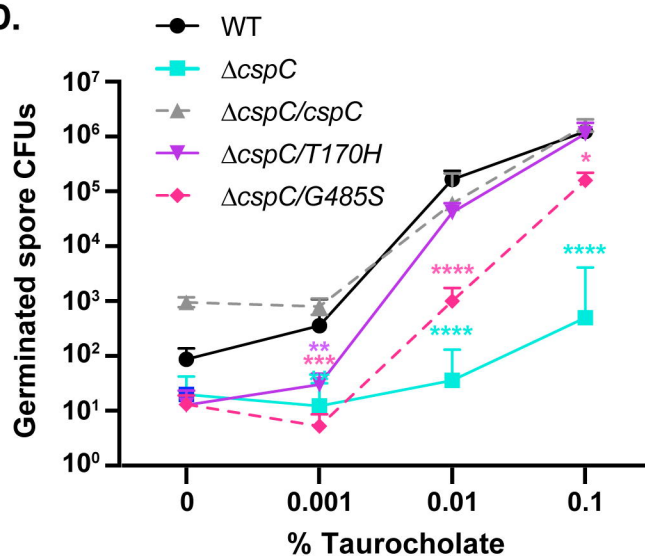

Figure 2. Mutations to restore CspC's catalytic triad decrease CspC levels and germination efficiency.



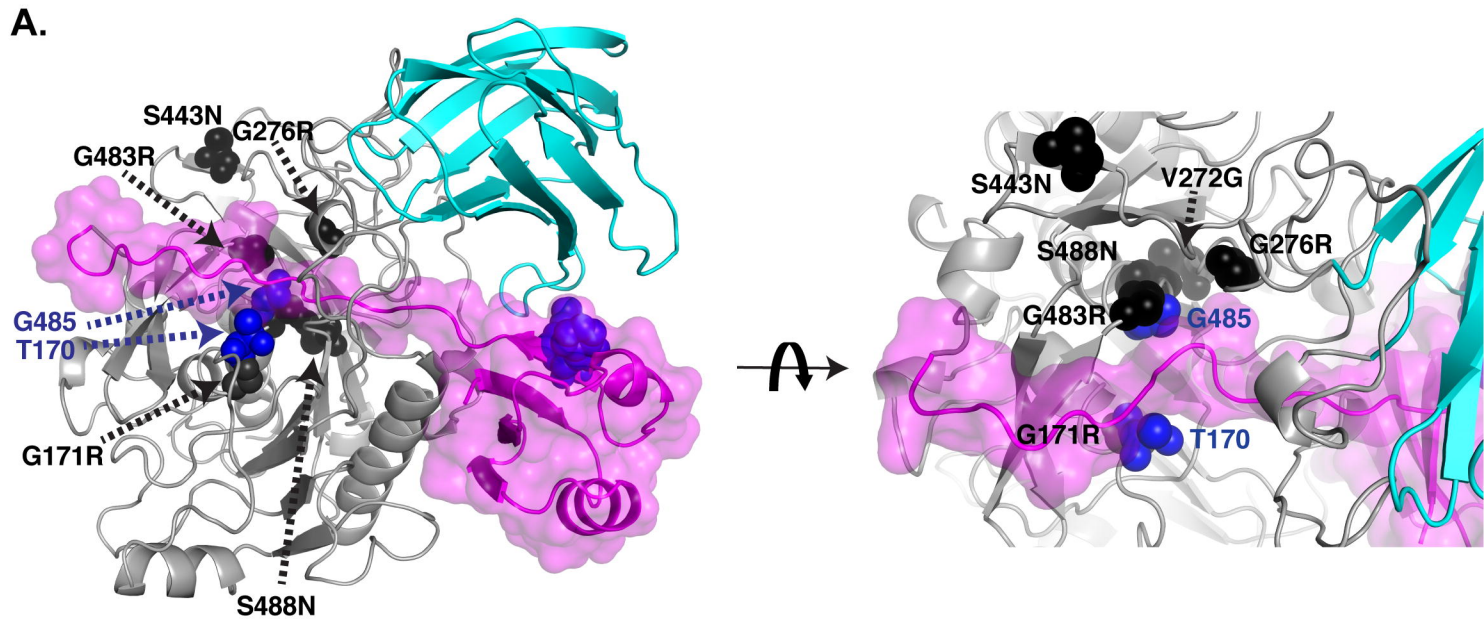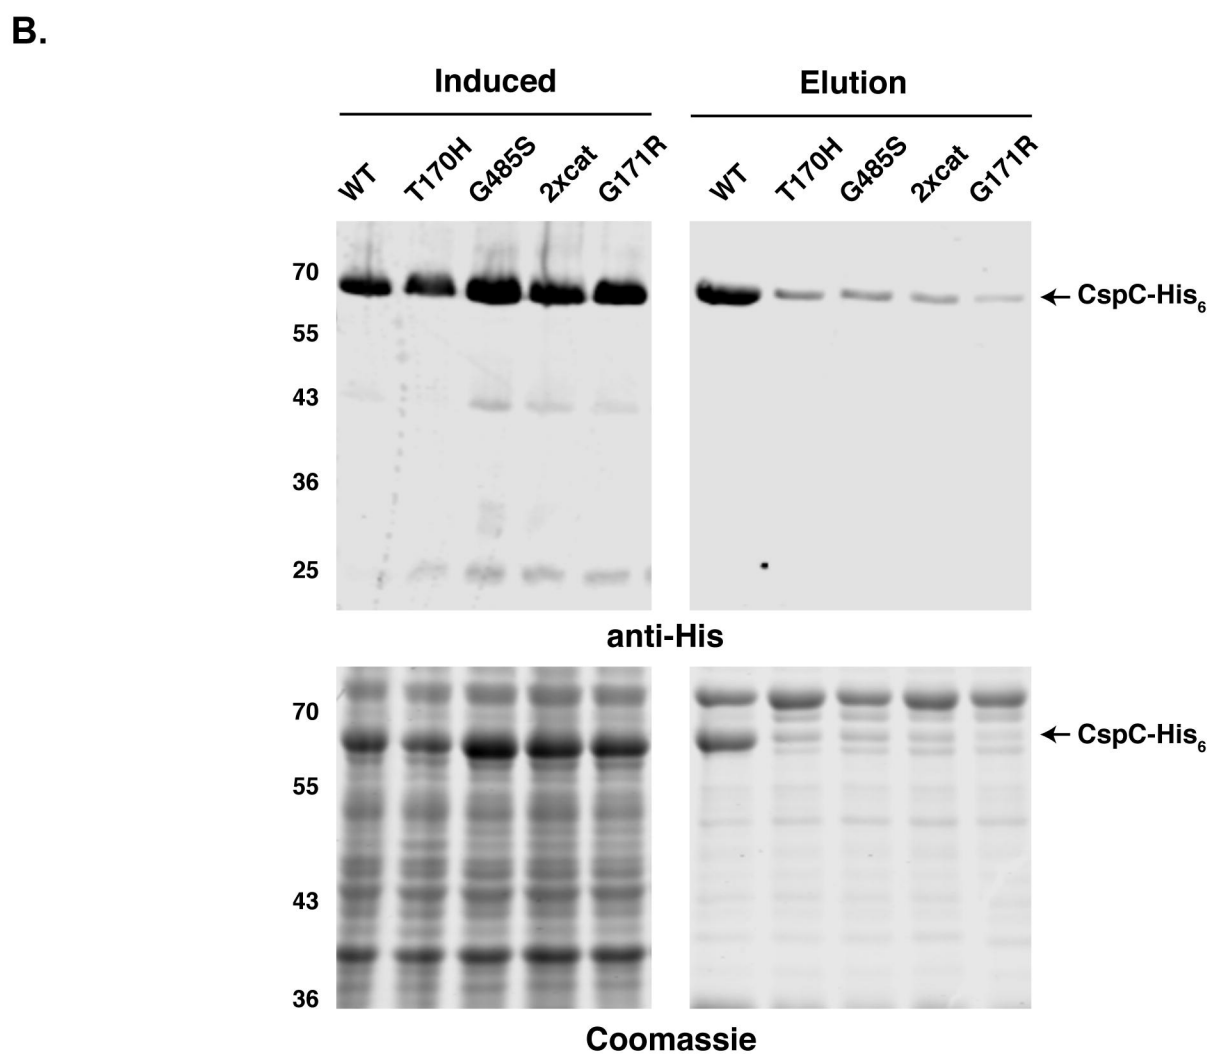

Figure 3. Restoring CspC's catalytic triad appears to impair folding in *E. coli*.

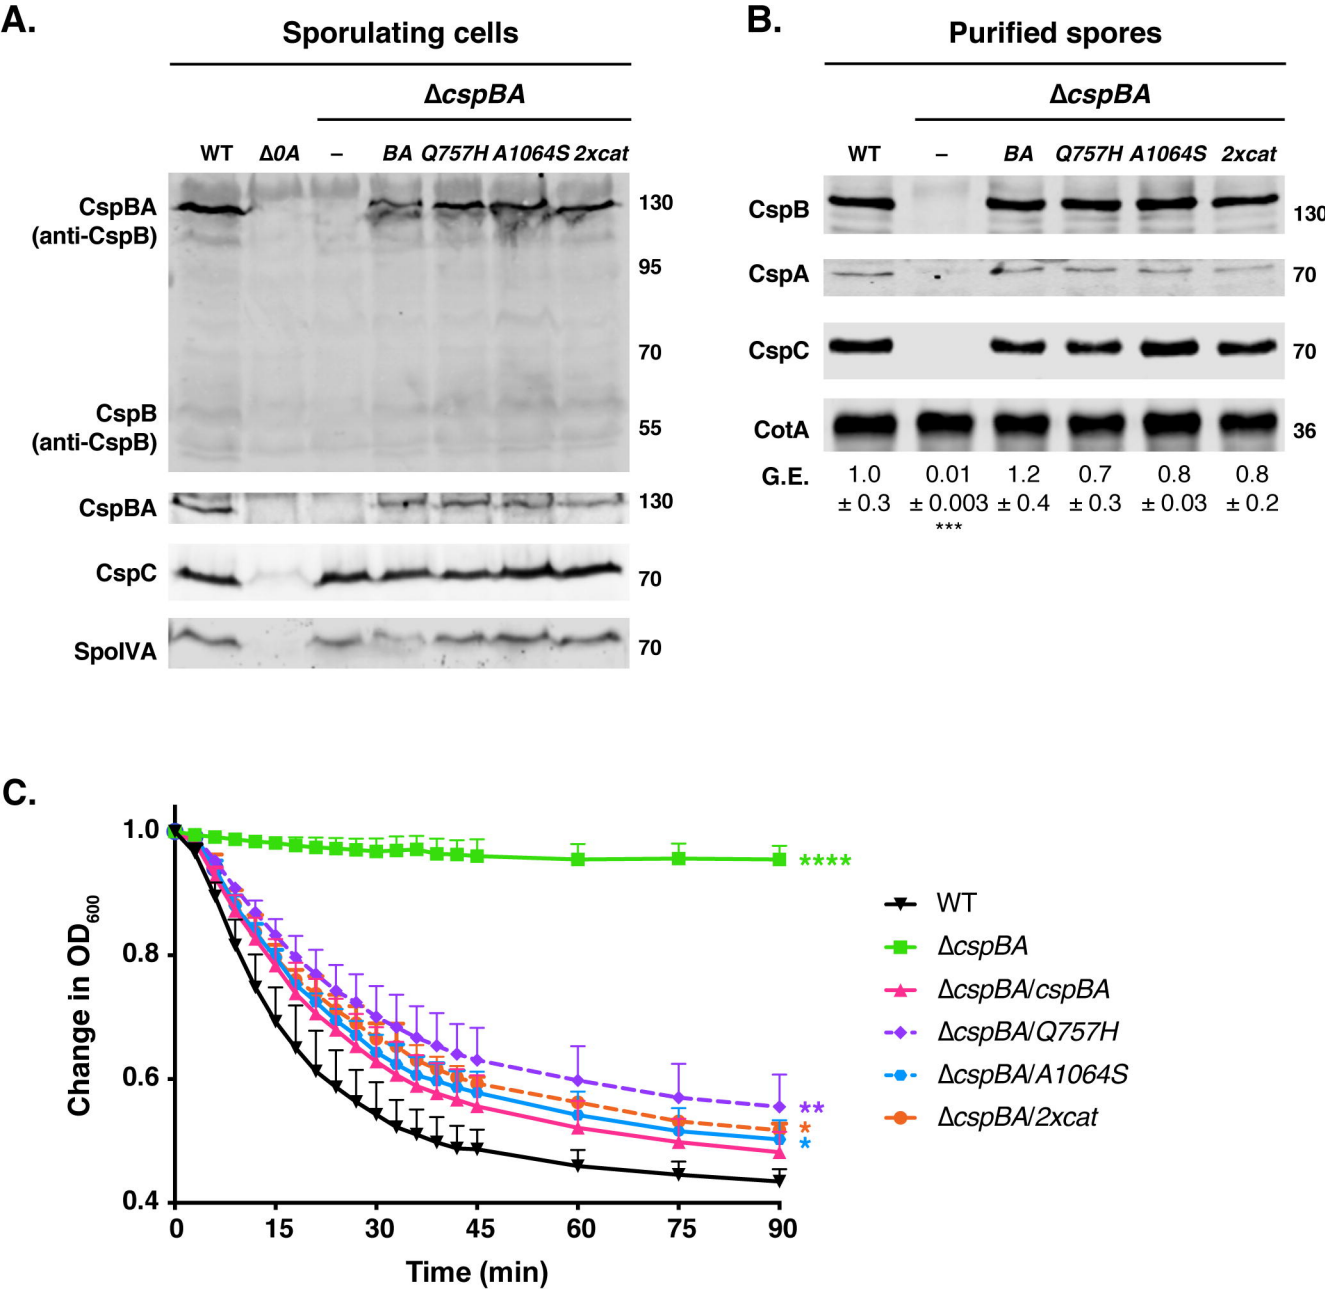

Figure 4. Restoring CspA's catalytic triad in *C. difficile* does not resurrect its protease activity or impact CspBA levels or function.

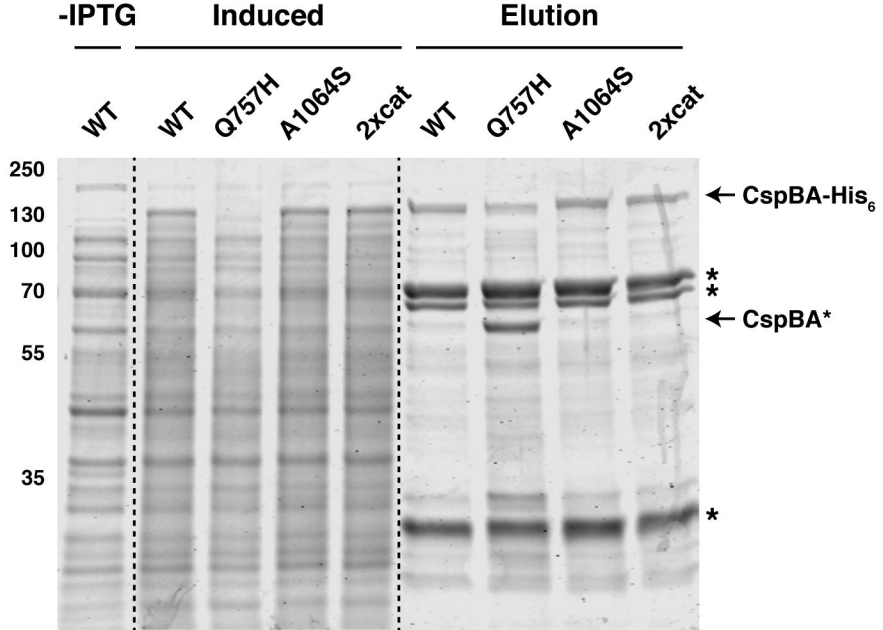

**Coomassie**

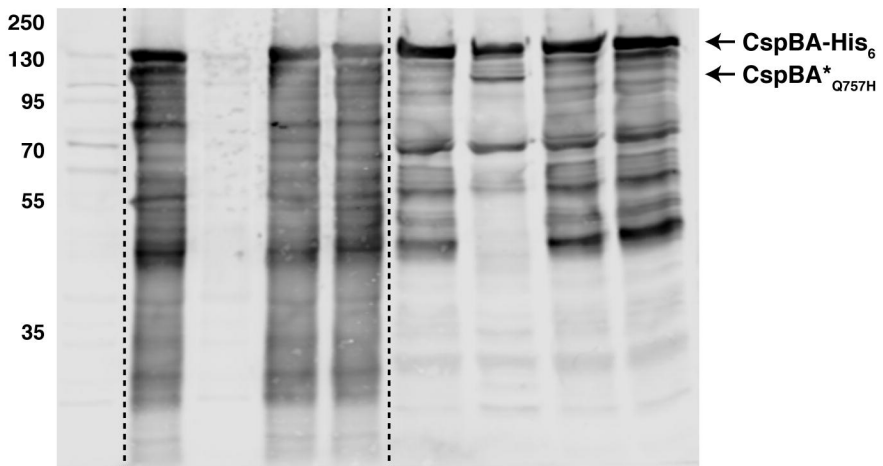

**anti-CspB**

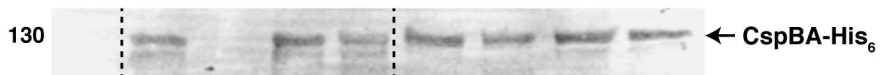

**anti-His**

Figure 5. Resurrection of the CspA active site does not restore protease activity in *E. coli*.
